# Supplementary material for: Impact of preterm birth on parental separation: a French population-based longitudinal study
Source: PubMed Central journal article supplement — BMJ Open. 2017 Nov 16;7(11):e017845. doi: 10.1136/bmjopen-2017-017845 (PMC5701975; doi:10.1136/bmjopen-2017-017845), 2017-11-16
Supplement: bmjopen-2017-017845.draft_revisions.pdf [file bmjopen-2017-017845.draft_revisions.pdf]

# BMJ Open

BMJ Open is committed to open peer review. As part of this commitment we make the peer review history of every article we publish publicly available.

When an article is published we post the peer reviewers' comments and the authors' responses online. We also post the versions of the paper that were used during peer review. These are the versions that the peer review comments apply to.

The versions of the paper that follow are the versions that were submitted during the peer review process. They are not the versions of record or the final published versions. They should not be cited or distributed as the published version of this manuscript.

BMJ Open is an open access journal and the full, final, typeset and author-corrected version of record of the manuscript is available on our site with no access controls, subscription charges or pay-per-view fees (<http://bmjopen.bmj.com>).

If you have any questions on BMJ Open's open peer review process please email [editorial.bmjopen@bmj.com](mailto:editorial.bmjopen@bmj.com)

# BMJ Open

## Risk factors for parental separation in preterm children: a population-based study

|                                 |                                                                                                                                                                                                                                                                                                                                                                                                                                                                         |
|---------------------------------|-------------------------------------------------------------------------------------------------------------------------------------------------------------------------------------------------------------------------------------------------------------------------------------------------------------------------------------------------------------------------------------------------------------------------------------------------------------------------|
| Journal:                        | <i>BMJ Open</i>                                                                                                                                                                                                                                                                                                                                                                                                                                                         |
| Manuscript ID                   | bmjopen-2017-017845                                                                                                                                                                                                                                                                                                                                                                                                                                                     |
| Article Type:                   | Research                                                                                                                                                                                                                                                                                                                                                                                                                                                                |
| Date Submitted by the Author:   | 22-May-2017                                                                                                                                                                                                                                                                                                                                                                                                                                                             |
| Complete List of Authors:       | Nusinovici, Simon<br>OLLIAC, Bertrand; Centre Hospitalier Esquirol, Child and adolescent psychiatry<br>Flamant, Cyril<br>muller, jean-baptiste; CHU Nantes, neonatology<br>Olivier, Marion<br>Bureau, Valérie<br>Gascouin, Geraldine; Angers University Hospital, Department of Neonatology<br>Basset, Hélène<br>Bouvard , Charlotte<br>Roze, JC; Centre Hospitalier Universitaire de Nantes Pole d'information medicale evaluation et sante publique<br>Hanf, Matthieu |
| <b>Primary Subject Heading</b>: | Paediatrics                                                                                                                                                                                                                                                                                                                                                                                                                                                             |
| Secondary Subject Heading:      | Epidemiology                                                                                                                                                                                                                                                                                                                                                                                                                                                            |
| Keywords:                       | parental separation, low gestational age, neurodevelopment outcome, cohort                                                                                                                                                                                                                                                                                                                                                                                              |
|                                 |                                                                                                                                                                                                                                                                                                                                                                                                                                                                         |

SCHOLARONE™  
Manuscripts

## Risk factors for parental separation in preterm children: a population-based study

Simon Nusinovici<sup>1</sup>, Bertrand Olliac<sup>2,3</sup>, Cyril Flamant<sup>1,4</sup>, Jean-Baptiste Müller<sup>4</sup>, Marion Olivier<sup>5</sup>, Valérie Rouger<sup>5</sup>, Géraldine Gascoin<sup>6</sup>, Hélène Basset<sup>7</sup>, Charlotte Bouvard<sup>8</sup>, Jean-Christophe Rozé<sup>1,4,5</sup>, Matthieu Hanf<sup>1</sup>

**Affiliations:** 1 National Institute of Health and Medical Research CIC 1413, Nantes University Hospital, F-44000 Nantes, France; 2 Department of Child and Adolescent Psychiatry, Centre Hospitalier Esquirol, Limoges, France; 3 National Institute of Health and Medical Research UMR1094, Tropical Neuroepidemiology, Limoges, France; 4 Department of Neonatal Medicine, Nantes University Hospital, F-44000 Nantes, France; 5 Réseau “Grandir Ensemble”, Nantes University Hospital, F-44000 Nantes, France; 6 Department of Neonatal Medicine, Angers University Hospital, F-49100 Angers, France; 7 Department of Neonatal Medicine, Le Mans Hospital, F-72037 Le Mans, France; 8 SOS Prema (parents of French preterm children organization), 32, rue du Chemin Vert, 92100 Boulogne-Billancourt, France

**Contact details:** Simon Nusinovici; National Institute of Health and Medical Research CIC 1413, 5 allée de l’Ile Gloriette, F-44000 Nantes, France; Email: [simon.nusinovici@chu-nantes.fr](mailto:simon.nusinovici@chu-nantes.fr); Phone: 00332 53 48 21 10; Fax: 00332 53 48 28 67

**Word count:** 2,758

**ABSTRACT**

**Objective:** The objective of this study was to investigate both the effects of low gestational age and child's neurodevelopmental outcome on the risk of parental separation within seven years of giving birth.

**Design:** prospective.

**Setting:** 24 maternity clinics in the Pays-de-la-Loire region.

**Participants:** This study included 5,732 infants delivered at <35 weeks of gestation born between 2005 and 2013 who were enrolled in the population-based LIFT cohort and who had a neurodevelopmental evaluation at two years.

**Outcome measure:** risk of parental separation.

**Results:** Ten percent (572/5,732) of the parents reported having undergone separation during the follow-up period. A mediation analysis showed that low gestational age had no direct effect on the risk of parental separation. Moreover, a non-optimal neurodevelopment at 2 years was associated with an increased risk of parental separation corresponding to a HR=1.49 [1.23; 1.80]. Finally, the increased risk of parental separation was aggravated by low socio-economic conditions.

**Conclusions:** The effect of low gestational age on the risk of parental separation was mediated by the child's neurodevelopment. This finding could be used to target at risk situations and offer support to help prevent the consequences of a child's neurodevelopmental disabilities on the family.

**Key words:** parental separation, low gestational age, neurodevelopment outcome, cohort

**Strength and limitations of the study:**

- This study was based on a large prospective population-based cohort of preterm infants (n=5,732).
- Appropriate multivariable statistical analyses were used to properly model the complex relationships between low gestational age, neurodevelopmental outcome and the risk of parental separation (mediation analyses and survival Cox models).
- The socio-economic factors known to influence the risk for parental separation were taken into account in order to limit possible confounding bias.
- No information was available regarding the relationship between the parents before the birth of their infants.
- Given that the gestational age of our reference population was between 32 and 34 weeks, we cannot exclude the existence of a small effect of preterm birth on the risk of parental separation.

## INTRODUCTION

Understanding the consequences of preterm birth on parental separation is critical as parental separation can strongly affect a child's development<sup>1</sup>. The increasing number of preterm births makes these questions more and more topical. Moreover, these questions are of great concern in public health and for structures such as preterm infants' parental organizations.

The birth of a preterm<sup>2-7</sup> or very low birthweight child (VLBW)<sup>5,8-10</sup> is a stressful event for the parents. Compared to mothers of full term infants, mothers of preterm infants have been shown to have a higher risk of experiencing psychological distress and depressive symptoms following the child's birth<sup>11-13</sup>. In addition to psychological distress, the birth of a preterm child frequently has a substantial economic impact on the family involved<sup>14,15</sup>. All these factors that affect the life of the family can have negative consequences for the relationship between the parents.

A neurodevelopmental disability following a preterm birth could mediate, at least partly, the effect of preterm birth on parental separation. Preterm births are indeed associated with a high risk of neurodevelopmental disabilities<sup>16,17</sup> that can also increase the risk of parental separation<sup>18-25</sup>. However, no longitudinal study using appropriate methods has investigated the complex relationships between low gestational age, neurodevelopmental outcome, and parental separation. The objective of this study was to investigate, in a large longitudinal population-based cohort of preterm infants, both the effects of low gestational age and the child's neurodevelopmental outcome on the risk of parental separation within seven years of giving birth.

## MATERIALS AND METHODS

## Study population

The study population was composed of surviving preterm infants enrolled in the Loire Infant Follow-up Team (LIFT), born at less than 35 weeks of gestation between January 2005 and December 2013, and who were evaluated at two years of corrected age to assess their neurodevelopmental outcomes (Figure 1). The LIFT network includes 24 maternity clinics in the Pays-de-la-Loire region (one of the 13 administrative regions in France) with the objective to screen for early clinical anomalies associated with preterm births and to provide specifically adapted care. The follow-up consisted of standardized visits by trained physicians at 3, 6, 9, 18, and 24 months as well as at 3, 4, 5, 6, and 7 years after the birth of the child.

## Perinatal data

Perinatal data was comprised of the date of birth, gender, gestational age (GA), and birthweight. The birthweight Z-score was computed according to the Olsen standards<sup>26</sup>.

## Parental situation

Information regarding relationship status was binary (i.e. as parents living together or parents living separately). For parents who had separated, the first date at which they were reported to be separated was used. Relationship status was not available at the time of inclusion. Consequently, for the separations reported at the 3-month visit, there was the possibility that the parents had already undergone separation at the time of the child's birth. Therefore, to ensure temporality between preterm birth and parental separation, separations reported at the 3-month visit were excluded.

## Neurodevelopmental outcome at two years

Children were evaluated at two years of corrected age. Assessment to define optimal and non-optimal neurodevelopmental outcomes included a physical examination by a LIFT-

1  
2  
3 trained pediatrician, a psychomotor evaluation by a LIFT network psychologist, and a parent-  
4  
5 completed questionnaire. Neuromotor evaluation was regarded as non-optimal in case of  
6  
7 cerebral palsy or when the physical examination revealed relatively milder signs of abnormal  
8  
9 movement during independent walking according to the Amiel-Tison criteria<sup>27</sup>. Psychomotor  
10  
11 evaluation was assessed with the revised Brunet-Lézine test (four domains:  
12  
13 movement/posture, coordination, language, and socialization)<sup>28</sup>. The mean and maximal  
14  
15 global scores were 100 and 140, respectively, and values of <85 were considered non-optimal  
16  
17 psychomotor development. Children who were not able to perform the revised Brunet-Lézine  
18  
19 test were considered to have non-optimal psychomotor development. Furthermore,  
20  
21 neurodevelopmental outcome was assessed with the parent-completed “Ages and Stages  
22  
23 Questionnaire” (ASQ)<sup>29,30</sup>. The ASQ assesses development in the following five areas:  
24  
25 communication, gross motor, fine motor, problem solving, and sociopersonal skills. The  
26  
27 maximal overall ASQ score is 300 and a score of <185 was considered non-optimal<sup>31</sup>. Finally,  
28  
29 sensory disabilities such as blindness or children that required a hearing aid were taken into  
30  
31 account. Overall, children with a non-optimal neuromotor and/or psychomotor assessment  
32  
33 and/or a sensory disability were regarded as having a “non-optimal neurodevelopmental  
34  
35 outcome.” Children without a documented physical examination or psychomotor assessment  
36  
37 were considered as non-assessable at two years except for children with severe neurological  
38  
39 disabilities. This definition of non-optimality has been used in other studies<sup>32–34</sup>. To simplify  
40  
41 matters, a non-optimal neurodevelopmental outcome will be referred to as non-optimality.  
42  
43  
44  
45  
46  
47

### 48 **Socioeconomic information**

49  
50 The socioeconomic data consisted of the socioeconomic level and eligibility for social  
51  
52 security benefits for those with low incomes. The socioeconomic level took into account the  
53  
54 parent with the more highly rated job according to a scale based on the official classification  
55  
56  
57  
58  
59  
60



1  
2  
3 developed by the French Institute for Statistics and Economic Studies (INSEE). The  
4 socioeconomic level and eligibility for social security benefits for those with low incomes  
5 were considered as two-level categorical variables.  
6  
7  
8

### 9 10 **Urbanicity of the residential municipality**

11  
12 The residential municipality was considered either urban or rural based on definitions  
13 developed by the INSEE<sup>1</sup>. Municipalities were considered rural or urban depending on the  
14 distance between buildings and the number of inhabitants.  
15  
16  
17  
18

### 19 20 **Statistical analysis**

21  
22 The statistical analyses were conducted in three steps. Firstly, the crude associations  
23 between gestational age and non-optimality at 2 years and the risk of parental separation were  
24 investigated with Kaplan-Meier curves and log-rank tests.  
25  
26  
27  
28

29  
30 Secondly, a mediation analysis was used to estimate the proportion of the effect of low  
31 gestational age on the risk of parental separation that was mediated by non-optimality at 2  
32 years. The aim of a mediation analysis is to decompose the effect of an exposure on an  
33 outcome into a direct effect and an indirect effect that is mediated by an intermediate variable  
34 (the mediator). Mediation analyses used were based on the counterfactual framework. A  
35 counterfactual variable describes what would have happened if we had intervened on  
36 exposure. This framework allows the decomposition of the causal effect into a so-called  
37 natural direct and natural indirect effect. A natural direct effect measures the change in  
38 outcome (the risk of parental separation) that would be observed if we could change the  
39 exposure (low gestational age) but leave the mediator (optimality at 2 years) at the value it  
40 naturally takes when the exposure is left unchanged. A natural indirect effect measures the  
41  
42  
43  
44  
45  
46  
47  
48  
49  
50  
51  
52  
53

54  
55 <sup>1</sup> <http://www.insee.fr/en/methodes/default.asp?page=definitions/unite-urbaine.htm>. Date  
56 accessed: February 2016.  
57

1  
2  
3 change in outcome (the risk of parental separation) that would be observed if we could change  
4 the mediator (optimality at 2 years) as much as it would naturally change when exposure was  
5 changed without actually changing the exposure (low gestational age). Gestational age was  
6 considered as a three-level categorical variable: GA 32-34 (reference), GA 28-31, and GA 24-  
7 27 weeks. The estimations of natural direct and indirect effects were done while adjusting for  
8 the possible confounding factors: gender, multiple pregnancies (“yes” or “no”), Z-score of  
9 birthweight (<-1, between -1 and 0, between 0 and 1, and  $\geq 1$ ), socioeconomic level (“high” or  
10 “intermediate”), social security benefits for those with low incomes (“yes” or “no”), and  
11 urbanicity of the residential municipality (“urban” versus “rural”). Moreover, this analysis  
12 accounted for the censored nature of the outcome. The possible interaction between the  
13 exposure and the mediator was tested. Mediation models used here are based on natural effect  
14 models<sup>35</sup> implemented in the R package medflex.

15  
16  
17  
18  
19  
20  
21  
22  
23  
24  
25  
26  
27  
28  
29  
30 Thirdly, the effect of the non-optimality at 2 years on the risk of parental separation  
31 was estimated using the multivariable Cox model. Furthermore, the effect of gestation age on  
32 non-optimality at 2 years was estimated using logistic regression. For these two models, the  
33 same adjustment variables as those considered in the mediation analysis were included in the  
34 models. All analyses were performed using R software<sup>2</sup>.

35  
36  
37  
38  
39  
40  
41 Three sensitivity analyses were performed. In the first one, parental separations  
42 occurring before the 24-month visit were excluded to ensure the temporality between  
43 neurodevelopmental outcome and parental separations. In the second analysis, an imputation  
44 of the missing data was performed using a multiple imputation method. The last analysis  
45 concerned the comparison of the characteristics of the children that were lost to follow-up  
46 between two and five years and those who were still followed at five years.

47  
48  
49  
50  
51  
52  
53  
54  
55 <sup>2</sup> R Core Team (2016). *R: A Language and Environment for Statistical Computing*. R  
56 Foundation for Statistical Computing, Vienna, Austria. <http://www.R-project.org/>

## Ethic approval

Written consent was obtained for each patient before inclusion in the study, and the cohort was registered at the French data protection authority in clinical research (“Commission Nationale de l’Informatique et des Libertés” or CNIL, No. 851117).

## RESULTS

Between January 2005 and December 2013, 6,937 infants born at less than 35 weeks of gestation in the Pays-de-la-Loire region, France, were enrolled in the LIFT cohort. The following infants were excluded from the study population: infants whose parents were separated at the three-month (n=185) or 84-month visit (n=20), children without neurodevelopmental evaluation at two years but still followed (n=392), and children lost to follow-up at two years (n=315). In light of these exclusions, the study population consisted of 5,732 preterm infants, corresponding to 83% of the infants initially enrolled in the cohort (Figure 1).

During the follow-up, 10.0% of the parents reported having undergone separation (n=572), corresponding with an incidence rate of 23.8 separations per 1000 children-year. The median time at which separations were reported was 22 months following the birth of the child with an interquartile range (IQR) of 10.3–43.3 months. 30.2% (n=1,730) and 8.9% (n=508) of the infants were born very or extremely preterm, respectively. 19.1% (n=1,096) of the children were considered non-optimal at two years. Lastly, the median length of the total follow-up was 56 months (IQR=32.1–69.2) (Table 1).

In the bivariable analysis, both gestational age and non-optimality at 2 years were associated with an increased risk of parental separation (Supplementary Table 1, Figure 2). However, the mediation analysis showed that all the effect of low gestational age in very and extremely preterm infants on the risk of parental separation was mediated by the non-

1  
2  
3 optimality at 2 years of age (Supplementary Figure 1). Preterm birth were associated with a  
4  
5 higher risk of non-optimal neurodevelopment at two years, corresponding to OR=2.1 [1.8,  
6  
7 2.4] and OR=4.2 [3.4, 5.2] for very and extremely preterm infants, respectively  
8  
9 (Supplementary Table 2). The non-optimality at 2 years was associated with an increased risk  
10  
11 of parental separation corresponding to a HR=1.49 [1.23, 1.80] (Table 2, Figure 3).  
12  
13 Furthermore, a significant interaction was found between non-optimality and social security  
14  
15 benefits due to low income on the risk of parental separation (Supplementary Table 3).  
16  
17 Finally, a lower parental socioeconomic level, receiving social security benefits due to low  
18  
19 income, and living in urban areas were associated with a higher risk of parental separation.  
20  
21 The results of the relationships between gestational age, non-optimality, and parental  
22  
23 separation are summarized in Figure 3.  
24  
25  
26  
27

## 28 **DISCUSSION**

29  
30  
31 Using a large population-based cohort study, we found that the effect of low  
32  
33 gestational age on the risk of parental separation was entirely mediated by the  
34  
35 neurodevelopmental outcome at two years. Parents of preterm infants with a non-optimal  
36  
37 neurodevelopment at two years were 50% more likely to have undergone separation in the  
38  
39 years following the birth of the child, independently of the socio-economic factors. This  
40  
41 increased risk was further aggravated by low socio-economic conditions.  
42  
43  
44

45  
46 A strength of this study was the use of mediation analysis. Because of the association  
47  
48 between gestational age and neurodevelopmental outcome at two years, mediation analysis is  
49  
50 a relevant approach to investigate the effects of gestational age and neurodevelopmental  
51  
52 outcome on the risk of parental separation. An alternative approach would have been to build  
53  
54 a single model predicting parental separation with these two risk factors and the adjustment  
55  
56 variables. However, this model would not have accounted for the strong association between  
57  
58  
59  
60

1  
2  
3 gestational age and neurodevelopmental outcome and, therefore, could have led to biased  
4  
5 results. A further strength of this study was the large number of infants included, which  
6  
7 allowed a high statistical power to be attained. In addition, the longitudinal data and the  
8  
9 corresponding survival analyses allowed us to account for the timing of parental separations,  
10  
11 rather than simply distinguishing between whether the parents were living together or not.  
12  
13 Furthermore, the socio-economic factors known to influence the risk for parental separation  
14  
15 were taken into account. For children whose parents underwent separation before the 24-  
16  
17 month visit (n=221), there was a doubt regarding the temporality between the  
18  
19 neurodevelopmental outcome and the parental separation. The sensitivity analysis showed that  
20  
21 without these children, the results were exactly the same, probably due to the early occurrence  
22  
23 of neurodevelopment impairments during the child's development (Supplementary Table 4).  
24  
25 Finally, a sensitivity analysis was performed after imputation of the missing data (n=1,000)  
26  
27 using a multiple imputation method. The robustness of the results demonstrated the absence  
28  
29 of bias related to missing data (Supplementary Table 5).  
30  
31  
32  
33  
34

35 The present study has several limitations. Firstly, this study may underestimate the  
36  
37 proportion of parental separation due to a bias in the declaration of relevant information; for  
38  
39 example, during the examination of the child by the pediatrician there could a degree of  
40  
41 reluctance from the parents to reveal that they are no longer living together. In our study,  
42  
43 12.3% of the parents were found to have undergone separation within an average follow-up  
44  
45 time span of 5 years (including separations occurring at the 3-month and 80-month visits that  
46  
47 were excluded from analyses). National statistics from the INSEE state that 9.9% of marriages  
48  
49 entered into in the year 2000 ended in divorce within 5 years<sup>3</sup>, suggesting that absence of bias  
50  
51 in parental separation declaration. Secondly, the characteristics of children that were excluded  
52  
53  
54

---

55  
56 <sup>3</sup> <http://www.insee.fr/fr/ffc/tef/tef2015/T15F033/T15F033.pdf>. Date accessed: February 2016  
57  
58

1  
2  
3 from the study population were not comparable to those who were included (Table 1). For  
4  
5 example, late preterm infants born to families with a lower socioeconomic level were  
6  
7 overrepresented in the category that was not included for the analysis. However, the absolute  
8  
9 differences in the perinatal characteristics were rather small, thus indicating that inclusion  
10  
11 criteria did not result in an obvious selection bias. Thirdly, given that the gestational age of  
12  
13 our reference population was between 32 and 34 weeks, we cannot exclude the existence of a  
14  
15 small effect of preterm birth on the risk of parental separation, albeit one that is not detectable  
16  
17 with our study design. Further studies using a population of full-term infants as reference are  
18  
19 needed to confirm our results. Fourthly, no information was available regarding the  
20  
21 relationship between the parents before the birth of their infants. A very conflictual  
22  
23 relationship might be associated with a higher risk of giving birth to a preterm child. Our  
24  
25 study could, therefore, overestimate the effect of a non-optimal neurodevelopment on the risk  
26  
27 of parental separation. Finally, some children were lost between two and five years of follow-  
28  
29 up (1,518 out of 4,813). These children had slightly different characteristics (Supplementary  
30  
31 Table 6). However, no difference was observed for the proportion of parents that underwent  
32  
33 separation.

34  
35  
36  
37  
38  
39 In the present study, optimality was defined using neuromotor, psychomotor, and  
40  
41 sensory evaluations, thereby revealing particularly severe pathologies or clinical symptoms.  
42  
43 The association between optimality and parental separation is in accordance with the results  
44  
45 of previous studies demonstrating negative consequences on the parent's relationship in case  
46  
47 of a severe disease<sup>19-21</sup>. Interestingly, parents of extremely preterm infants with an optimal  
48  
49 neurodevelopment at two years did not have a higher risk of separation. The increased risk of  
50  
51 separation by parents of VLBW (<1500g)<sup>36</sup> in a US national survey conducted on 6,016  
52  
53 births might be due to the fact that occurrences of disability were not taken into account  
54  
55  
56  
57  
58  
59  
60

1  
2  
3 during the follow-up. Therefore, we agree with the authors' statement that their values may be  
4 regarded as conservative estimates of the effect of child disability on parental separation.  
5  
6 While a preterm birth may not, on average, be directly responsible for the disruption of a  
7 couple's relationship, the discovery of associated severe child disabilities or  
8 neurodevelopmental delays could profoundly challenge the parent's relationship. The  
9 increased risk of parental separation seems to be due to the presence of repeated stressful  
10 events within the first years of the child's life. Lastly, this study provides evidence for a major  
11 impact of socioeconomic factors on the risk of parental separation. This result is in  
12 accordance with several studies that showed no or limited parental education and low family  
13 income are strong risk factors for separation <sup>21,24,37,38</sup>, for parental stress <sup>8-10</sup>, and for  
14 psychological distress <sup>11</sup>.  
15  
16  
17  
18  
19  
20  
21  
22  
23  
24  
25  
26  
27

## 28 CONCLUSIONS

29  
30 The effect of low gestational age on the risk of parental separation was mediated by  
31 the child's neurodevelopment, with 50% more separations among parents of children with  
32 non-optimal neurodevelopment. This increased risk was aggravated by low socio-economic  
33 conditions. This finding could be used to target at risk situations and offer specific support to  
34 help prevent the negative consequences of a child's neurodevelopmental disabilities on the  
35 family.  
36  
37  
38  
39  
40  
41  
42  
43

## 44 Funding source

45  
46 This work was supported by grants from the Regional Health Agency of Pays de la Loire. The  
47 sponsor had no role in this manuscript.  
48  
49  
50  
51

## 52 Declaration of interest

53  
54 The authors have declared that they have no conflict of interest  
55  
56  
57  
58  
59  
60

### Author's contributions

Matthieu Hanf had the original idea, provided guidance for the statistical analysis and reviewed and revised the manuscript. Simon Nusinovici performed the statistical analysis, the literature searches and wrote the paper. Jean-Baptiste Müller, Géraldine Gascoin, Hélène Basset, Cyril Flamant, Bertrand Olliac, Valérie Rouger, Charlotte Bouvard and Jean-Christophe Rozé participated to the data collection, reviewed and revised the manuscript. Marion Pérennec participated to the analysis and interpretation of the data, reviewed and revised the manuscript. All the authors approved the final manuscript as submitted and agree to be accountable for all aspects of the work.

### Data sharing statement:

Data are available from the scientific Committee of the LIFT cohort for researchers who meet the criteria for access to confidential health data. Interested researchers have to comply with the French legislation i.e. require the advice of the “Comité consultatif sur le traitement de l’information en matière de recherché sur le domaine de la santé” (CCTIRS) as well as the authorization of the “Commission nationale de l’information et des libertés” (CNIL) for the treatment of personal health data. Research projects have also to be approved by an independent Ethics Committee. Contact information is available at: <http://www.reseau-naissance.fr/module-pagesetter-viewpub-tid-2-pid-21.html>



## REFERENCES

1. Amato PR, Keith B. Parental divorce and the well-being of children: a meta-analysis. *Psychol Bull.* 1991;110(1):26-46.
2. Meyer EC, Garcia Coll CT, Seifer R, Ramos A, Kilis E, Oh W. Psychological distress in mothers of preterm infants. *J Dev Behav Pediatr JDBP.* 1995;16(6):412-417.
3. Younger JB, Kendell MJ, Pickler RH. Mastery of stress in mothers of preterm infants. *J Soc Pediatr Nurses JSPN.* 1997;2(1):29-35.
4. Trombini E, Surcinelli P, Piccioni A, Alessandrini R, Faldella G. Environmental factors associated with stress in mothers of preterm newborns. *Acta Paediatr Oslo Nor* 1992. 2008;97(7):894-898. doi:10.1111/j.1651-2227.2008.00849.x.
5. Singer LT, Salvator A, Guo S, Collin M, Lilien L, Baley J. Maternal psychological distress and parenting stress after the birth of a very low-birth-weight infant. *JAMA.* 1999;281(9):799-805.
6. Schappin R, Wijnroks L, Uniken Venema MMAT, Jongmans MJ. Rethinking stress in parents of preterm infants: a meta-analysis. *PLoS One.* 2013;8(2):e54992. doi:10.1371/journal.pone.0054992.
7. Zerach G, Elsayag A, Shefer S, Gabis L. Long-Term Maternal Stress and Post-traumatic Stress Symptoms Related to Developmental Outcome of Extremely Premature Infants. *Stress Health J Int Soc Investig Stress.* 2015;31(3):204-213. doi:10.1002/smi.2547.
8. Singer LT, Fulton S, Kirchner HL, et al. Parenting very low birth weight children at school age: maternal stress and coping. *J Pediatr.* 2007;151(5):463-469. doi:10.1016/j.jpeds.2007.04.012.
9. Tommiska V, Ostberg M, Fellman V. Parental stress in families of 2 year old extremely low birthweight infants. *Arch Dis Child Fetal Neonatal Ed.* 2002;86(3):F161-164.
10. Wormald F, Tapia JL, Torres G, et al. Stress in parents of very low birth weight preterm infants hospitalized in neonatal intensive care units. A multicenter study. *Arch Argent Pediatr.* 2015;113(4):303-309. doi:10.1590/S0325-00752015000400005.
11. Davis L, Edwards H, Mohay H, Wollin J. The impact of very premature birth on the psychological health of mothers. *Early Hum Dev.* 2003;73(1-2):61-70.
12. Miles MS, Holditch-Davis D, Schwartz TA, Scher M. Depressive symptoms in mothers of prematurely born infants. *J Dev Behav Pediatr JDBP.* 2007;28(1):36-44. doi:10.1097/01.DBP.0000257517.52459.7a.
13. Pace CC, Spittle AJ, Molesworth CM-L, et al. Evolution of Depression and Anxiety Symptoms in Parents of Very Preterm Infants During the Newborn Period. *JAMA Pediatr.* July 2016. doi:10.1001/jamapediatrics.2016.0810.

- 1  
2  
3 14. McCormick MC, Bernbaum JC, Eisenberg JM, Kustra SL, Finnegan E. Costs incurred  
4 by parents of very low birth weight infants after the initial neonatal hospitalization.  
5 *Pediatrics*. 1991;88(3):533-541.  
6
- 7 15. Kusters CDJ, van der Pal SM, van Steenbrugge GJ, den Ouden LS, Kollée LAA. [The  
8 impact of a premature birth on the family; consequences are experienced even after 19  
9 years]. *Ned Tijdschr Geneeskd*. 2013;157(25):A5449.  
10
- 11 16. Bhutta AT, Cleves MA, Casey PH, Cradock MM, Anand KJS. Cognitive and behavioral  
12 outcomes of school-aged children who were born preterm: a meta-analysis. *JAMA*.  
13 2002;288(6):728-737.  
14
- 15 17. Saigal S, Doyle LW. An overview of mortality and sequelae of preterm birth from  
16 infancy to adulthood. *Lancet Lond Engl*. 2008;371(9608):261-269. doi:10.1016/S0140-  
17 6736(08)60136-1.  
18
- 19 18. Reichman NE, Corman H, Noonan K. Impact of child disability on the family. *Matern  
20 Child Health J*. 2008;12(6):679-683. doi:10.1007/s10995-007-0307-z.  
21
- 22 19. Joesch JM, Smith KR. Children's health and their mothers' risk of divorce or separation.  
23 *Soc Biol*. 1997;44(3-4):159-169.  
24
- 25 20. Tew BJ, Laurence KM, Payne H, Rawnsley K. Marital stability following the birth of a  
26 child with spina bifida. *Br J Psychiatry J Ment Sci*. 1977;131:79-82.  
27
- 28 21. Reichman NE, Corman H, Noonan K. Effects of child health on parents' relationship  
29 status. *Demography*. 2004;41(3):569-584.  
30
- 31 22. Hartley SL, Barker ET, Seltzer MM, et al. The relative risk and timing of divorce in  
32 families of children with an autism spectrum disorder. *J Fam Psychol JFP J Div Fam  
33 Psychol Am Psychol Assoc Div 43*. 2010;24(4):449-457. doi:10.1037/a0019847.  
34
- 35 23. Lederman VRG, Alves B dos S, Negrão J, et al. Divorce in families of children with  
36 Down Syndrome or Rett Syndrome. *Ciênc Saúde Coletiva*. 2015;20(5):1363-1369.  
37 doi:10.1590/1413-81232015205.13932014.  
38
- 39 24. Lau S, Lu X, Balsamo L, et al. Family life events in the first year of acute lymphoblastic  
40 leukemia therapy: a children's oncology group report. *Pediatr Blood Cancer*.  
41 2014;61(12):2277-2284. doi:10.1002/psc.25195.  
42
- 43 25. Mauldon J. Children's Risks of Experiencing Divorce and Remarriage: Do Disabled  
44 Children Destabilize Marriages? *Popul Stud J Demogr*. 1992;46(2):349-362.  
45 doi:10.1080/0032472031000146276.  
46
- 47 26. Olsen IE, Groveman SA, Lawson ML, Clark RH, Zemel BS. New intrauterine growth  
48 curves based on United States data. *Pediatrics*. 2010;125(2):e214-224.  
49 doi:10.1542/peds.2009-0913.  
50
- 51 27. Amiel-Tison C. Update of the Amiel-Tison neurologic assessment for the term neonate  
52 or at 40 weeks corrected age. *Pediatr Neurol*. 2002;27(3):196-212.  
53  
54  
55  
56  
57  
58  
59  
60

- 1
  - 2
  - 3
  - 4
  - 5
  - 6
  - 7
  - 8
  - 9
  - 10
  - 11
  - 12
  - 13
  - 14
  - 15
  - 16
  - 17
  - 18
  - 19
  - 20
  - 21
  - 22
  - 23
  - 24
  - 25
  - 26
  - 27
  - 28
  - 29
  - 30
  - 31
  - 32
  - 33
  - 34
  - 35
  - 36
  - 37
  - 38
  - 39
  - 40
  - 41
  - 42
  - 43
  - 44
  - 45
  - 46
  - 47
  - 48
  - 49
  - 50
  - 51
  - 52
  - 53
  - 54
  - 55
  - 56
  - 57
  - 58
  - 59
  - 60
28. Josse D. Revised Brunet–Lezine scale of psychomotor development of first childhood [in French]. *Etablissement D'Applications Psychotech Paris Fr.* 1997.
29. Squires J, Bricker D, Potter L. Revision of a parent-completed development screening tool: Ages and Stages Questionnaires. *J Pediatr Psychol.* 1997;22(3):313-328.
30. Skellern CY, Rogers Y, O'Callaghan MJ. A parent-completed developmental questionnaire: follow up of ex-premature infants. *J Paediatr Child Health.* 2001;37(2):125-129.
31. Flamant C, Branger B, Nguyen The Tich S, et al. Parent-completed developmental screening in premature children: a valid tool for follow-up programs. *PLoS One.* 2011;6(5):e20004. doi:10.1371/journal.pone.0020004.
32. Gouin M, Nguyen S, Savagner C, et al. Severe bronchiolitis in infants born very preterm and neurodevelopmental outcome at 2 years. *Eur J Pediatr.* 2013;172(5):639-644. doi:10.1007/s00431-013-1940-8.
33. Leroux BG, N'Guyen The Tich S, Branger B, et al. Neurological assessment of preterm infants for predicting neuromotor status at 2 years: results from the LIFT cohort. *BMJ Open.* 2013;3(2):e002431-e002431. doi:10.1136/bmjopen-2012-002431.
34. Gouin M, Flamant C, Gascoin G, et al. The Association of Urbanicity with Cognitive Development at Five Years of Age in Preterm Children. Carpenter DO, ed. *PLOS ONE.* 2015;10(7):e0131749. doi:10.1371/journal.pone.0131749.
35. Lange T, Vansteelandt S, Bekaert M. A simple unified approach for estimating natural direct and indirect effects. *Am J Epidemiol.* 2012;176(3):190-195. doi:10.1093/aje/kwr525.
36. Swaminathan S, Alexander GR, Boulet S. Delivering a very low birth weight infant and the subsequent risk of divorce or separation. *Matern Child Health J.* 2006;10(6):473-479. doi:10.1007/s10995-006-0146-3.
37. Jena AB, Goldman DP, Joyce G. Association between the birth of twins and parental divorce. *Obstet Gynecol.* 2011;117(4):892-897. doi:10.1097/AOG.0b013e3182102adf.
38. Urbano RC, Hodapp RM. Divorce in families of children with Down syndrome: a population-based study. *Am J Ment Retard AJMR.* 2007;112(4):261-274. doi:10.1352/0895-8017(2007)112[261:DIFOCW]2.0.CO;2.

**Table 1.** Descriptive characteristics of the study population and comparison between preterm infants included in the study and those not included.

| Variable                                       | Category     | Included<br>(n=5,732) | Not included<br>(n=1,205) | P value |
|------------------------------------------------|--------------|-----------------------|---------------------------|---------|
|                                                |              | Number (%)            | Number (%)                |         |
| Gestational age (weeks)                        | 32–34        | 3,494 (61.0)          | 802 (66.6)                | < 0.001 |
|                                                | 28–31        | 1,730 (30.2)          | 321 (26.6)                |         |
|                                                | 24–27        | 508 (8.9)             | 82 (6.8)                  |         |
| Gender                                         | Female       | 2,640 (46.1)          | 589 (48.9)                | 0.079   |
|                                                | Male         | 3,092 (53.9)          | 616 (51.1)                |         |
| Multiple pregnancy                             | No           | 3,617 (63.1)          | 830 (68.9)                | < 0.001 |
|                                                | Yes          | 2,115 (36.9)          | 375 (31.1)                |         |
| Z score of birth weight                        | <-1          | 1,378 (24.0)          | 285 (23.9)                | 0.999   |
|                                                | -1 to 0      | 2,044 (35.7)          | 426 (35.7)                |         |
|                                                | 0 to 1       | 1,787 (31.2)          | 371 (31.1)                |         |
|                                                | >1           | 523 (9.1)             | 110 (9.2)                 |         |
| Socio-economic level                           | Intermediate | 4,254 (74.2)          | 1,024 (85.0)              | < 0.001 |
|                                                | High         | 1,478 (25.8)          | 181 (15.0)                |         |
| Social security benefits due to low income     | No           | 5,031 (87.8)          | 968 (80.3)                | < 0.001 |
|                                                | Yes          | 701 (12.2)            | 237 (19.7)                |         |
| Urbanicity                                     | Rural        | 2,104 (36.7)          | 376 (31.2)                | < 0.001 |
|                                                | Urban        | 3,628 (63.3)          | 829 (68.8)                |         |
| Length of follow-up (months)<br>[Median (IQR)] |              | 56 [32.1, 69.2]       | 16.6 [8.1, 56.9]          | < 0.001 |

IQR: interquartile range

**Table 2.** Crude and adjusted association between the neurodevelopment of preterm infants and the risk of parental separation. Adjustment was made on perinatal characteristics of the infants, the socio-economic level of the family, and the urbanicity of the residential municipality (n=5,732).

|                                                  | Category     | N (%)        | Raw HR<br>[95% CI] | Adjusted HR<br>[95% CI] |
|--------------------------------------------------|--------------|--------------|--------------------|-------------------------|
| Optimality at 2 years*                           | Yes          | 4,636 (80.9) | 1                  | 1                       |
|                                                  | No           | 1,096 (19.1) | 1.58 [1.31, 1.90]  | 1.49 [1.23, 1.80]       |
| Gender                                           | Female       | 2,640 (46.1) | 1                  | 1                       |
|                                                  | Male         | 3,092 (53.9) | 1.07 [0.90, 1.26]  | 1.07 [0.91, 1.27]       |
| Multiple pregnancy                               | No           | 3,617 (63.1) | 1                  | 1                       |
|                                                  | Yes          | 2,115 (36.9) | 0.94 [0.79, 1.11]  | 0.97 [0.81, 1.15]       |
| Z score of birthweight                           | <-1          | 1,378 (24.0) | 1                  | 1                       |
|                                                  | -1 to 0      | 2,044 (35.7) | 1.03 [0.84, 1.28]  | 1.1 [0.89, 1.36]        |
|                                                  | 0 to 1       | 1,787 (31.2) | 0.9 [0.72, 1.12]   | 0.96 [0.77, 1.20]       |
|                                                  | >1           | 523 (9.1)    | 0.96 [0.70, 1.33]  | 1.03 [0.75, 1.43]       |
| Socio-economic level                             | Intermediate | 4,254 (74.2) | 1                  | 1                       |
|                                                  | High         | 1,478 (25.8) | 0.62 [0.50, 0.76]  | 0.64 [0.52, 0.79]       |
| Social security benefits (SSB) due to low income | No           | 5,031 (87.8) | 1                  | 1                       |
|                                                  | Yes          | 701 (12.2)   | 4.09 [3.43, 4.86]  | 3.68 [3.09, 4.39]       |
| Urbanicity                                       | Rural        | 2,104 (36.7) | 1                  | 1                       |
|                                                  | Urban        | 3,628 (63.3) | 1.91 [1.57, 2.31]  | 1.81 [1.49, 2.20]       |

HR: hazards ratio; CI: confidence interval

\*Children with a non-optimal neuromotor and/or psychomotor assessment and/or sensorial disability at two years were considered as non-optimal.

Figure 1. Flowchart

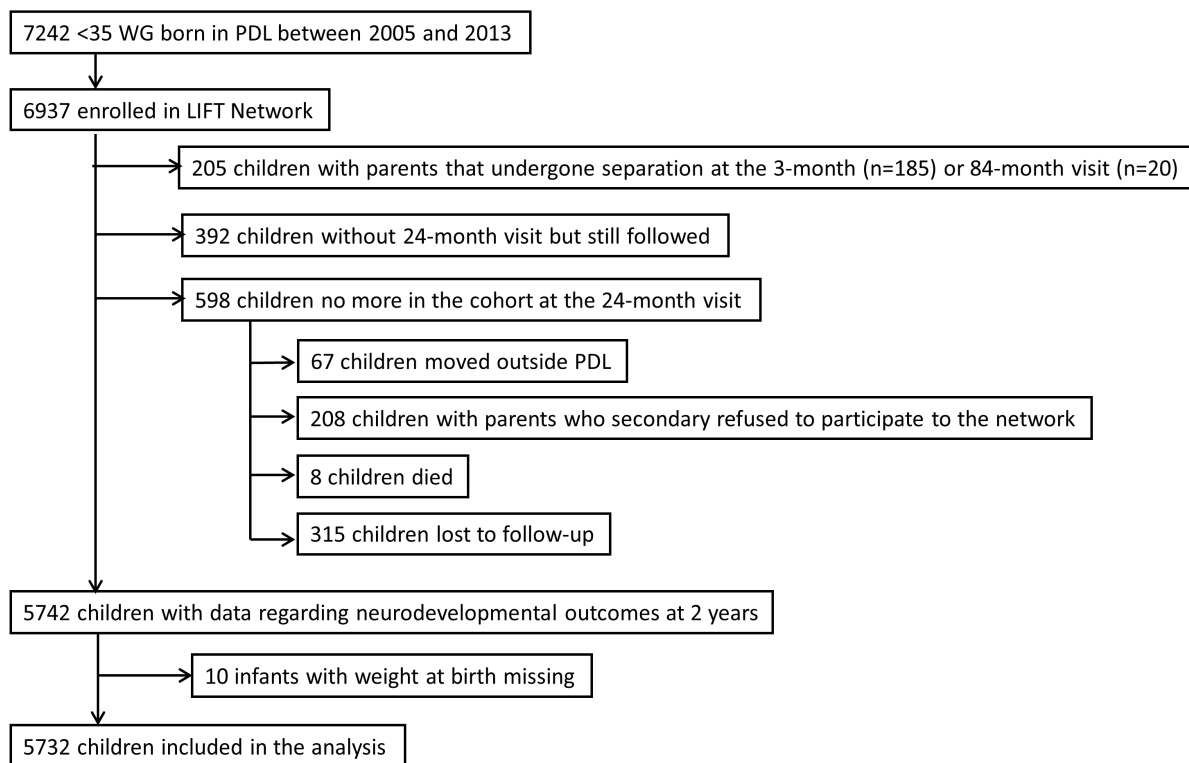

WG: weeks of gestation; PDL: Pays-de-la-Loire region; LIFT: Loire Infant Follow-up Team.

1  
2  
3  
4  
5  
6  
7  
8  
9  
10  
11  
12  
13  
14  
15  
16  
17  
18  
19  
20  
21  
22  
23  
24  
25  
26  
27  
28  
29  
30  
31  
32  
33  
34  
35  
36  
37  
38  
39  
40  
41  
42  
43  
44  
45  
46  
47  
48  
49  
50  
51  
52  
53  
54  
55  
56  
57  
58  
59  
60

**Figure 2.** Relationship between the neurodevelopment of preterm infants and the occurrence of parental separation, using Kaplan-Meier curves (n=5,732).

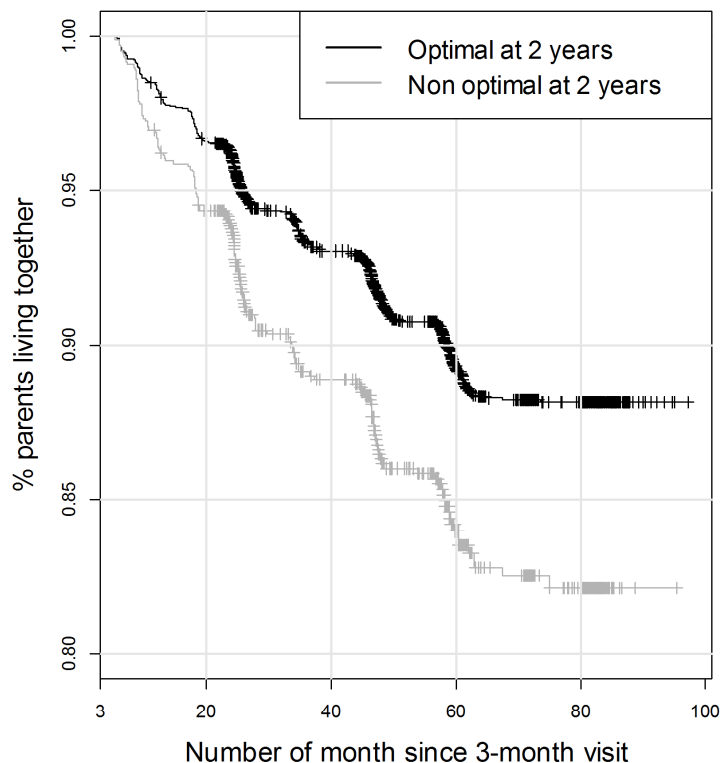

| N at risk              | Number of month since 3-month visit |      |      |      |     |
|------------------------|-------------------------------------|------|------|------|-----|
|                        | 0                                   | 20   | 40   | 60   | 80  |
| Optimal at 2 years     | 4636                                | 4406 | 3248 | 1755 | 543 |
| Non-optimal at 2 years | 1096                                | 1004 | 694  | 335  | 119 |

ew only

**Figure 3.** Summary of the relationships between low gestational age, neurodevelopment of preterm infants (non-optimality at two years), and the risk of parental separation.

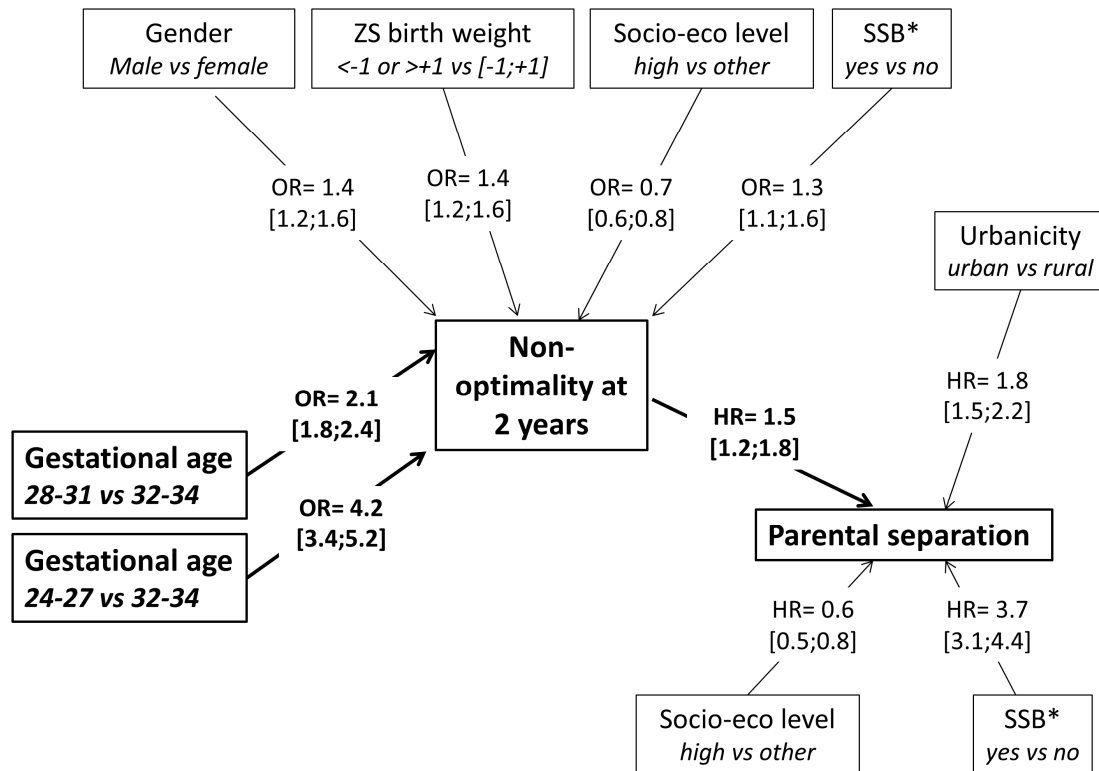

\*SSB: Social security benefits due to low income; ZS: Z-score.

Odds ratio (OR) and hazard ratio (HR) were estimated using two different models (because of the absence of direct effect of low gestational age on the risk of parental separation). Model 1: logistic regression with outcome = non-optimality at two years and exposure = gestational age. Model 2: Cox model with outcome = parental separation and exposure = non-optimality at two years. Adjustment variables for both models: gender, multiple pregnancies, Z-score of birthweight, socioeconomic level, social security benefits for those with low incomes, and urbanicity of the residential municipality. Only significant adjustment variables were reported in this figure.



Supplementary materials

**Supplementary Figure 1.** Decomposition of the effect of low gestational age on the risk of parental separation into a direct effect and an indirect effect mediated by the neurodevelopment of preterm infants (non-optimality at two years). This mediation model was adjusted for gender, multiple pregnancy, Z-score of birthweight, socioeconomic level, social security benefits for those with low incomes, and urbanicity of the residential municipality.

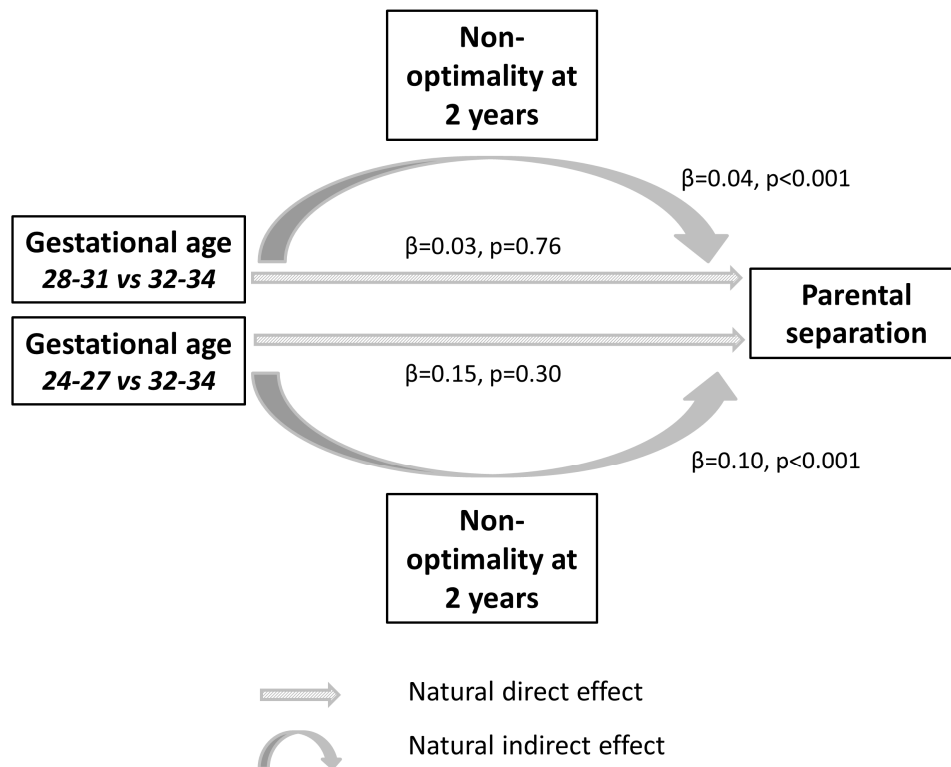

**Supplementary Table 1.** Incidence risks and incidence rates of parental separation in preterm infants population according to the perinatal characteristics of the child, the socio-economic level of the family and the urbanicity of the residential municipality (n=5,732).

| Variable                                   | Category     | Incidence risk of parental separation (N events/N at risk) x 100 | Incidence rate of parental separation for 1000 children-year | P value** |
|--------------------------------------------|--------------|------------------------------------------------------------------|--------------------------------------------------------------|-----------|
| Gestational age (weeks)                    | 32–34        | 9.6                                                              | 22.6                                                         | 0.030     |
|                                            | 28–31        | 9.9                                                              | 24.1                                                         |           |
|                                            | 24–27        | 13.0                                                             | 31.6                                                         |           |
| Optimality at 2 years*                     | Yes          | 9.2                                                              | 21.5                                                         | < 0.001   |
|                                            | No           | 13.4                                                             | 34.2                                                         |           |
| Gender                                     | Female       | 9.6                                                              | 23.0                                                         | 0.450     |
|                                            | Male         | 10.3                                                             | 24.5                                                         |           |
| Multiple pregnancy                         | No           | 10.2                                                             | 24.3                                                         | 0.460     |
|                                            | Yes          | 9.6                                                              | 22.9                                                         |           |
| Z score of birthweight                     | <-1          | 10.3                                                             | 24.3                                                         | 0.570     |
|                                            | -1 to 0      | 10.5                                                             | 25.3                                                         |           |
|                                            | 0 to 1       | 9.2                                                              | 21.8                                                         |           |
|                                            | >1           | 9.6                                                              | 23.5                                                         |           |
| Socio-economic level                       | Intermediate | 10.8                                                             | 26.7                                                         | < 0.001   |
|                                            | High         | 7.5                                                              | 16.4                                                         |           |
| Social security benefits due to low income | No           | 7.6                                                              | 17.7                                                         | < 0.001   |
|                                            | Yes          | 27.4                                                             | 73.6                                                         |           |
| Urbanicity                                 | Rural        | 6.6                                                              | 15.2                                                         | < 0.001   |
|                                            | Urban        | 12.0                                                             | 29.1                                                         |           |

\*Children with a non-optimal neuromotor and/or psychomotor assessment and/or sensorial disability at two years were considered as non-optimal.

\*\*log-rank test

**Supplementary Table 2.** Adjusted associations between the risk of non-optimal neurodevelopment at two years and gestational age with adjustment variables for preterm infants born between 2005 and 2013 followed in the LIFT cohort (n=5,732).

| Variable                                         | Category     | N (%)        | Adjusted OR<br>[95%CI] |
|--------------------------------------------------|--------------|--------------|------------------------|
| Gestational age (weeks)                          | 32–34        | 3,494 (61.0) | 1                      |
|                                                  | 28–31        | 1,730 (30.2) | 2.06 [1.78, 2.39]      |
|                                                  | 24–27        | 508 (8.9)    | 4.23 [3.43, 5.20]      |
| Gender                                           | Female       | 2,640 (46.1) | 1                      |
|                                                  | Male         | 3,092 (53.9) | 1.38 [1.2, 1.59]       |
| Multiple pregnancy                               | No           | 3,617 (63.1) | 1                      |
|                                                  | Yes          | 2,115 (36.9) | 0.94 [0.82, 1.09]      |
| Z score of birthweight                           | <-1          | 1,378 (24.0) | 1                      |
|                                                  | -1 to 0      | 2,044 (35.7) | 0.73 [0.61, 0.87]      |
|                                                  | 0 to 1       | 1,787 (31.2) | 0.72 [0.6, 0.87]       |
|                                                  | >1           | 523 (9.1)    | 0.99 [0.77, 1.26]      |
| Socio-economic level                             | Intermediate | 4,254 (74.2) | 1                      |
|                                                  | High         | 1,478 (25.8) | 0.72 [0.61, 0.85]      |
| Social security benefits (SSB) due to low income | No           | 5,031 (87.8) | 1                      |
|                                                  | Yes          | 701 (12.2)   | 1.31 [1.07, 1.59]      |
| Urbanicity                                       | Rural        | 2,104 (36.7) | 1                      |
|                                                  | Urban        | 3,628 (63.3) | 0.90 [0.78, 1.04]      |

OR: odds ratio; CI: confidence interval.

**Supplementary Table 3.** Crude and adjusted associations between the risk of parental separation and neurodevelopment of preterm infants (optimality at two years) with adjustment variables and interaction term between optimality at two years and social security benefits due to low income (n=5,732).

| Variable                                         | Category     | N (%)        | Adjusted HR<br>[95% CI] |
|--------------------------------------------------|--------------|--------------|-------------------------|
| Optimality at 2 years*                           | Yes          | 4,636 (80.9) | 1                       |
|                                                  | No           | 1,096 (19.1) | 1.27 [0.99, 1.63]       |
| Gender                                           | Female       | 2,640 (46.1) | 1                       |
|                                                  | Male         | 3,092 (53.9) | 1.07 [0.91, 1.26]       |
| Multiple pregnancy                               | No           | 3,617 (63.1) | 1                       |
|                                                  | Yes          | 2,115 (36.9) | 0.96 [0.81, 1.14]       |
| Z score of birthweight                           | <-1          | 1,378 (24.0) | 1                       |
|                                                  | -1 to 0      | 2,044 (35.7) | 1.10 [0.89, 1.36]       |
|                                                  | 0 to 1       | 1,787 (31.2) | 0.97 [0.77, 1.21]       |
|                                                  | >1           | 523 (9.1)    | 1.04 [0.76, 1.44]       |
| Socio-economic level                             | Intermediate | 4,254 (74.2) | 1                       |
|                                                  | High         | 1,478 (25.8) | 0.64 [0.52, 0.79]       |
| Social security benefits (SSB) due to low income | No           | 5,031 (87.8) | 1                       |
|                                                  | Yes          | 701 (12.2)   | 3.27 [2.65, 4.04]       |
| Urbanicity                                       | Rural        | 2,104 (36.7) | 1                       |
|                                                  | Urban        | 3,628 (63.3) | 1.80 [1.49, 2.19]       |
| Optimality at 2 years * SSB                      | Yes * No     | 4,102 (71.6) | 1                       |
|                                                  | No * Yes     | 167 (2.9)    | 1.52 [1.03, 2.23]       |

HR: hazards ratio; SSB: social security benefits; CI: confidence interval.

\*Children with a non-optimal neuromotor and/or psychomotor assessment and/or sensorial disability at two years were considered as non-optimal.

**Supplementary Table 4.** Adjusted associations between the risk of parental separation occurring from the 24-month visit and neurodevelopment of preterm infants (optimality at two years) with adjustment variables (n=5,511). In this analysis, the separations occurring between the 6-month and the 18-month visit were excluded.

|                                                  | Category     | N (%)        | Adjusted HR<br>[95% CI] |
|--------------------------------------------------|--------------|--------------|-------------------------|
| Optimality at 2 years*                           | Yes          | 4,477 (81.2) | 1                       |
|                                                  | No           | 1,034 (18.8) | 1.49 [1.17, 1.91]       |
| Gender                                           | Female       | 2,549 (46.3) | 1                       |
|                                                  | Male         | 2,962 (53.7) | 0.98 [0.79, 1.21]       |
| Multiple pregnancy                               | No           | 3,479 (63.1) | 1                       |
|                                                  | Yes          | 2,032 (36.9) | 0.90 [0.72, 1.13]       |
| Z score of birthweight                           | <-1          | 1,326 (24.1) | 1                       |
|                                                  | -1 to 0      | 1,952 (35.4) | 1.01 [0.77, 1.32]       |
|                                                  | 0 to 1       | 1,729 (31.4) | 0.98 [0.74, 1.30]       |
|                                                  | >1           | 504 (9.1)    | 1.02 [0.68, 1.54]       |
| Socio-economic level                             | Intermediate | 4,068 (73.8) | 1                       |
|                                                  | High         | 1,443 (26.2) | 0.67 [0.52, 0.87]       |
| Social security benefits (SSB) due to low income | No           | 4,903 (89.0) | 1                       |
|                                                  | Yes          | 608 (11.0)   | 3.01 [2.38, 3.81]       |
| Urbanicity                                       | Rural        | 2,054 (37.3) | 1                       |
|                                                  | Urban        | 3,457 (62.7) | 1.82 [1.43, 2.32]       |

HR: hazards ratio; CI: confidence interval.

\*Children with a non-optimal neuromotor and/or psychomotor assessment and/or sensorial disability at two years were considered as non-optimal.

**Supplementary Table 5.** Adjusted associations between the risk of parental separation and neurodevelopment of preterm infants (optimality at two years) with adjustment variables after imputation of missing values (13 infants with weight at birth missing and 990 infants with neurodevelopmental outcome at two years missing) using the multiple imputation method (n=6,732).

| Variable                                   | Category     | Adjusted HR<br>[95% CI] |
|--------------------------------------------|--------------|-------------------------|
| Optimality at 2 years*                     | Yes          | 1                       |
|                                            | No           | 1.45 [1.21, 1.73]       |
| Gender                                     | Female       | 1                       |
|                                            | Male         | 1.06 [0.91, 1.24]       |
| Multiple pregnancy                         | No           | 1                       |
|                                            | Yes          | 0.97 [0.83, 1.14]       |
| Z score of birthweight                     | <-1          | 1                       |
|                                            | -1 to 0      | 1.06 [0.87, 1.29]       |
|                                            | 0 to 1       | 0.92 [0.74, 1.13]       |
|                                            | >1           | 0.98 [0.72, 1.33]       |
| Socio-economic level                       | Intermediate | 1                       |
|                                            | High         | 0.68 [0.56, 0.82]       |
| Social security benefits due to low income | No           | 1                       |
|                                            | Yes          | 3.91 [3.32, 4.60]       |
| Urbanicity                                 | Rural        | 1                       |
|                                            | Urban        | 1.81 [1.51, 2.18]       |

HR: hazards ratio; CI: confidence interval.

\*Children with a non-optimal neuromotor and/or psychomotor assessment and/or sensorial disability at two years were considered as non-optimal.

**Supplementary Table 6.** Comparison of the infants born <35 weeks between 2005 and 2011 still followed at the 60-month visit (n=3,295) and those lost to follow-up between the 24-month and the 60-month visit (n=1,518).

| Variable                                         | Category        | Children still followed at the 60-month visit (n=3295) | Children lost to follow-up between the 24-month and the 60-month visit (n=1518) | P value |
|--------------------------------------------------|-----------------|--------------------------------------------------------|---------------------------------------------------------------------------------|---------|
| Parental separation                              | Living together | 2,868 (87.0)                                           | 1,309 (86.2)                                                                    | 0.469   |
|                                                  | Separated       | 427 (13.0)                                             | 209 (13.8)                                                                      |         |
| Gestational age (weeks)                          | 32–34           | 2,025 (61.5)                                           | 949 (62.5)                                                                      | 0.772   |
|                                                  | 28–31           | 978 (29.7)                                             | 440 (29.0)                                                                      |         |
|                                                  | 24–27           | 292 (8.9)                                              | 129 (8.5)                                                                       |         |
| Optimality at 2 years*                           | Yes             | 2,719 (82.5)                                           | 1,190 (78.4)                                                                    | < 0.001 |
|                                                  | No              | 576 (17.5)                                             | 328 (21.6)                                                                      |         |
| Gender                                           | Female          | 1,507 (45.7)                                           | 693 (45.7)                                                                      | 0.982   |
|                                                  | Male            | 1,788 (54.3)                                           | 825 (54.3)                                                                      |         |
| Multiple pregnancy                               | No              | 2,063 (62.6)                                           | 949 (62.5)                                                                      | 0.976   |
|                                                  | Yes             | 1,232 (37.4)                                           | 569 (37.5)                                                                      |         |
| Z score of birthweight                           | <-1             | 816 (24.8)                                             | 357 (23.6)                                                                      | 0.192   |
|                                                  | -1 to 0         | 1,156 (35.1)                                           | 579 (38.2)                                                                      |         |
|                                                  | 0 to 1          | 1,030 (31.3)                                           | 444 (29.3)                                                                      |         |
|                                                  | >1              | 291 (8.8)                                              | 135 (8.9)                                                                       |         |
| Socio-economic level                             | Intermediate    | 2,318 (70.3)                                           | 1,191 (78.5)                                                                    | < 0.001 |
|                                                  | High            | 977 (29.7)                                             | 327 (21.5)                                                                      |         |
| Social security benefits due to low income (SSB) | No              | 2,864 (86.9)                                           | 1,292 (85.1)                                                                    | 0.099   |
|                                                  | Yes             | 431 (13.1)                                             | 226 (14.9)                                                                      |         |
| Urbanicity                                       | Rural           | 1,221 (37.1)                                           | 550 (36.2)                                                                      | 0.604   |
|                                                  | Urban           | 2,074 (62.9)                                           | 968 (63.8)                                                                      |         |

\*Children with a non-optimal neuromotor and/or psychomotor assessment and/or sensorial disability at two years were considered as non-optimal.

## STROBE Statement—checklist of items that should be included in reports of observational studies

|                           | Item No | Recommendation                                                                                                                                                                                                                                                                                                                                                                                                                                                         | Page                 |
|---------------------------|---------|------------------------------------------------------------------------------------------------------------------------------------------------------------------------------------------------------------------------------------------------------------------------------------------------------------------------------------------------------------------------------------------------------------------------------------------------------------------------|----------------------|
| <b>Title and abstract</b> | 1       | (a) Indicate the study's design with a commonly used term in the title or the abstract                                                                                                                                                                                                                                                                                                                                                                                 | 1                    |
|                           |         | (b) Provide in the abstract an informative and balanced summary of what was done and what was found                                                                                                                                                                                                                                                                                                                                                                    | 2                    |
| <b>Introduction</b>       |         |                                                                                                                                                                                                                                                                                                                                                                                                                                                                        |                      |
| Background/rationale      | 2       | Explain the scientific background and rationale for the investigation being reported                                                                                                                                                                                                                                                                                                                                                                                   | 4                    |
| Objectives                | 3       | State specific objectives, including any prespecified hypotheses                                                                                                                                                                                                                                                                                                                                                                                                       | 4                    |
| <b>Methods</b>            |         |                                                                                                                                                                                                                                                                                                                                                                                                                                                                        |                      |
| Study design              | 4       | Present key elements of study design early in the paper                                                                                                                                                                                                                                                                                                                                                                                                                | 5,7,8                |
| Setting                   | 5       | Describe the setting, locations, and relevant dates, including periods of recruitment, exposure, follow-up, and data collection                                                                                                                                                                                                                                                                                                                                        | 5-7                  |
| Participants              | 6       | (a) <i>Cohort study</i> —Give the eligibility criteria, and the sources and methods of selection of participants. Describe methods of follow-up<br><i>Case-control study</i> —Give the eligibility criteria, and the sources and methods of case ascertainment and control selection. Give the rationale for the choice of cases and controls<br><i>Cross-sectional study</i> —Give the eligibility criteria, and the sources and methods of selection of participants | 5                    |
|                           |         | (b) <i>Cohort study</i> —For matched studies, give matching criteria and number of exposed and unexposed<br><i>Case-control study</i> —For matched studies, give matching criteria and the number of controls per case                                                                                                                                                                                                                                                 | Not applicable       |
| Variables                 | 7       | Clearly define all outcomes, exposures, predictors, potential confounders, and effect modifiers. Give diagnostic criteria, if applicable                                                                                                                                                                                                                                                                                                                               | 5-8                  |
| Data sources/measurement  | 8*      | For each variable of interest, give sources of data and details of methods of assessment (measurement). Describe comparability of assessment methods if there is more than one group                                                                                                                                                                                                                                                                                   | 5-8                  |
| Bias                      | 9       | Describe any efforts to address potential sources of bias                                                                                                                                                                                                                                                                                                                                                                                                              | 7,8 + sup tab 4, 5 6 |
| Study size                | 10      | Explain how the study size was arrived at                                                                                                                                                                                                                                                                                                                                                                                                                              | Not applicable       |
| Quantitative variables    | 11      | Explain how quantitative variables were handled in the analyses. If applicable, describe which groupings were chosen and why                                                                                                                                                                                                                                                                                                                                           | 8                    |
| Statistical methods       | 12      | (a) Describe all statistical methods, including those used to control for confounding                                                                                                                                                                                                                                                                                                                                                                                  | 7,8                  |
|                           |         | (b) Describe any methods used to examine subgroups and interactions                                                                                                                                                                                                                                                                                                                                                                                                    | Sup tab 3            |
|                           |         | (c) Explain how missing data were addressed                                                                                                                                                                                                                                                                                                                                                                                                                            | Sup tab 5            |
|                           |         | (d) <i>Cohort study</i> —If applicable, explain how loss to follow-up was addressed<br><i>Case-control study</i> —If applicable, explain how matching of cases and controls was addressed<br><i>Cross-sectional study</i> —If applicable, describe analytical methods taking                                                                                                                                                                                           | Sup tab 6            |



|                          |     | account of sampling strategy                                                                                                                                                                                 |            |
|--------------------------|-----|--------------------------------------------------------------------------------------------------------------------------------------------------------------------------------------------------------------|------------|
|                          |     | (e) Describe any sensitivity analyses                                                                                                                                                                        | Sup mat    |
| <b>Results</b>           |     |                                                                                                                                                                                                              | Page       |
| Participants             | 13* | (a) Report numbers of individuals at each stage of study—eg numbers potentially eligible, examined for eligibility, confirmed eligible, included in the study, completing follow-up, and analysed            | Fig1       |
|                          |     | (b) Give reasons for non-participation at each stage                                                                                                                                                         | 9          |
|                          |     | (c) Consider use of a flow diagram                                                                                                                                                                           | Fig1       |
| Descriptive data         | 14* | (a) Give characteristics of study participants (eg demographic, clinical, social) and information on exposures and potential confounders                                                                     | Tab1       |
|                          |     | (b) Indicate number of participants with missing data for each variable of interest                                                                                                                          | Tab1, Fig1 |
|                          |     | (c) <i>Cohort study</i> —Summarise follow-up time (eg, average and total amount)                                                                                                                             | Tab1       |
| Outcome data             | 15* | <i>Cohort study</i> —Report numbers of outcome events or summary measures over time                                                                                                                          | 9          |
|                          |     | <i>Case-control study</i> —Report numbers in each exposure category, or summary measures of exposure                                                                                                         |            |
|                          |     | <i>Cross-sectional study</i> —Report numbers of outcome events or summary measures                                                                                                                           |            |
| Main results             | 16  | (a) Give unadjusted estimates and, if applicable, confounder-adjusted estimates and their precision (eg, 95% confidence interval). Make clear which confounders were adjusted for and why they were included | Tab2       |
|                          |     | (b) Report category boundaries when continuous variables were categorized                                                                                                                                    | Tab1       |
|                          |     | (c) If relevant, consider translating estimates of relative risk into absolute risk for a meaningful time period                                                                                             |            |
| Other analyses           | 17  | Report other analyses done—eg analyses of subgroups and interactions, and sensitivity analyses                                                                                                               | Sup mat    |
| <b>Discussion</b>        |     |                                                                                                                                                                                                              |            |
| Key results              | 18  | Summarise key results with reference to study objectives                                                                                                                                                     | 10         |
| Limitations              | 19  | Discuss limitations of the study, taking into account sources of potential bias or imprecision. Discuss both direction and magnitude of any potential bias                                                   | 11,12      |
| Interpretation           | 20  | Give a cautious overall interpretation of results considering objectives, limitations, multiplicity of analyses, results from similar studies, and other relevant evidence                                   | 11-13      |
| Generalisability         | 21  | Discuss the generalisability (external validity) of the study results                                                                                                                                        | 12         |
| <b>Other information</b> |     |                                                                                                                                                                                                              |            |
| Funding                  | 22  | Give the source of funding and the role of the funders for the present study and, if applicable, for the original study on which the present article is based                                                | 13         |

\*Give information separately for cases and controls in case-control studies and, if applicable, for exposed and unexposed groups in cohort and cross-sectional studies.

**Note:** An Explanation and Elaboration article discusses each checklist item and gives methodological background and published examples of transparent reporting. The STROBE checklist is best used in conjunction with this article (freely available on the Web sites of PLoS Medicine at <http://www.plosmedicine.org/>, Annals of Internal Medicine at <http://www.annals.org/>, and Epidemiology at <http://www.epidem.com/>). Information on the STROBE Initiative is available at [www.strobe-statement.org](http://www.strobe-statement.org).

# BMJ Open

## Impact of preterm birth on parental separation: a French population based longitudinal study

|                                 |                                                                                                                                                                                                                                                                                                                                                                                                                                                                         |
|---------------------------------|-------------------------------------------------------------------------------------------------------------------------------------------------------------------------------------------------------------------------------------------------------------------------------------------------------------------------------------------------------------------------------------------------------------------------------------------------------------------------|
| Journal:                        | <i>BMJ Open</i>                                                                                                                                                                                                                                                                                                                                                                                                                                                         |
| Manuscript ID                   | bmjopen-2017-017845.R1                                                                                                                                                                                                                                                                                                                                                                                                                                                  |
| Article Type:                   | Research                                                                                                                                                                                                                                                                                                                                                                                                                                                                |
| Date Submitted by the Author:   | 01-Aug-2017                                                                                                                                                                                                                                                                                                                                                                                                                                                             |
| Complete List of Authors:       | Nusinovici, Simon<br>OLLIAC, Bertrand; Centre Hospitalier Esquirol, Child and adolescent psychiatry<br>Flamant, Cyril<br>muller, jean-baptiste; CHU Nantes, neonatology<br>Olivier, Marion<br>Bureau, Valérie<br>Gascouin, Geraldine; Angers University Hospital, Department of Neonatology<br>Basset, Hélène<br>Bouvard , Charlotte<br>Roze, JC; Centre Hospitalier Universitaire de Nantes Pole d'information medicale evaluation et sante publique<br>Hanf, Matthieu |
| <b>Primary Subject Heading</b>: | Paediatrics                                                                                                                                                                                                                                                                                                                                                                                                                                                             |
| Secondary Subject Heading:      | Epidemiology                                                                                                                                                                                                                                                                                                                                                                                                                                                            |
| Keywords:                       | parental separation, low gestational age, neurodevelopment outcome, cohort                                                                                                                                                                                                                                                                                                                                                                                              |
|                                 |                                                                                                                                                                                                                                                                                                                                                                                                                                                                         |

SCHOLARONE™  
Manuscripts

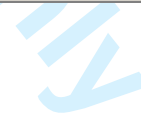

# Impact of preterm birth on parental separation: a French population based longitudinal study

Simon Nusinovici<sup>1</sup>, Bertrand Olliac<sup>2,3</sup>, Cyril Flamant<sup>1,4</sup>, Jean-Baptiste Müller<sup>4</sup>, Marion Olivier<sup>5</sup>, Valérie Rouger<sup>5</sup>, Géraldine Gascoin<sup>6</sup>, Hélène Basset<sup>7</sup>, Charlotte Bouvard<sup>8</sup>, Jean-Christophe Rozé<sup>1,4,5</sup>, Matthieu Hanf<sup>1</sup>

**Affiliations:** 1 INSERM CIC 1413, Clinical Investigation Center, Nantes University Hospital, F-44000 Nantes, France; 2 Department of Child and Adolescent Psychiatry, Centre Hospitalier Esquirol, Limoges, France; 3 National Institute of Health and Medical Research UMR1094, Tropical Neuroepidemiology, Limoges, France; 4 Department of Neonatal Medicine, Nantes University Hospital, F-44000 Nantes, France; 5 Réseau “Grandir Ensemble”, Nantes University Hospital, F-44000 Nantes, France; 6 Department of Neonatal Medicine, Angers University Hospital, F-49100 Angers, France; 7 Department of Neonatal Medicine, Le Mans Hospital, F-72037 Le Mans, France; 8 SOS Prema (parents of French preterm children organization), 32, rue du Chemin Vert, 92100 Boulogne-Billancourt, France

**Contact details:** Simon Nusinovici; National Institute of Health and Medical Research CIC 1413, 5 allée de l’Ile Gloriette, F-44000 Nantes, France; Email: [simon.nusinovici@chu-nantes.fr](mailto:simon.nusinovici@chu-nantes.fr); Phone: 00332 53 48 21 10; Fax: 00332 53 48 28 67

**Word count:** 2,758

## ABSTRACT

**Objective:** The objective of this study was to investigate both the effects of low gestational age and infant's neurodevelopmental outcome at two years of age on the risk of parental separation within seven years of giving birth.

**Design:** prospective.

**Setting:** 24 maternity clinics in the Pays-de-la-Loire region.

**Participants:** This study included 5,732 infants delivered at <35 weeks of gestation born between 2005 and 2013 who were enrolled in the population-based LIFT cohort and who had a neurodevelopmental evaluation at two years. This neurodevelopmental evaluation was based on a physical examination, a psychomotor evaluation and a parent-completed questionnaire.

**Outcome measure:** risk of parental separation (parents living together or parents living separately).

**Results:** Ten percent (572/5,732) of the parents reported having undergone separation during the follow-up period. A mediation analysis showed that low gestational age had no direct effect on the risk of parental separation. Moreover, a non-optimal neurodevelopment at 2 years was associated with an increased risk of parental separation corresponding to a HR=1.49 [1.23; 1.80]. Finally, the increased risk of parental separation was aggravated by low socio-economic conditions.

**Conclusions:** The effect of low gestational age on the risk of parental separation was mediated by the infant's neurodevelopment.

**Key words:** parental separation, low gestational age, neurodevelopment outcome, cohort

**Strength and limitations of the study:**

- This study was based on a large prospective population-based cohort of preterm infants (n=5,732).
- Appropriate multivariable statistical analyses were used to properly model the complex relationships between low gestational age, neurodevelopmental outcome and the risk of parental separation (mediation analyses and survival Cox models).
- The socio-economic factors known to influence the risk for parental separation were taken into account in order to limit possible confounding bias.
- No information was available regarding the relationship between the parents before the birth of their infants.
- Given that the gestational age of our reference population was between 32 and 34 weeks, we cannot exclude the existence of a small effect of preterm birth on the risk of parental separation.

## INTRODUCTION

Understanding the impact of preterm birth on parental separation is critical as parental separation have negative consequences in childhood<sup>1-3</sup>, notably on cognitive and psychological developments that can persist in the adolescence<sup>4</sup> and adulthood<sup>5,6</sup>. In France, 9.9% of marriages entered into in the year 2000 ended in divorce within 5 years (National statistics from the French Institute for Statistics and Economic Studies<sup>1</sup> - INSEE). The increasing number of preterm births makes these questions more and more topical. Moreover, these questions are of great concern in public health and for structures such as preterm infants' parental organizations.

The birth of a preterm<sup>7-12</sup> or very low birthweight infant (VLBW)<sup>10,13-15</sup> is a stressful event for the parents. Compared to mothers of full term infants, mothers of preterm infants have been shown to have a higher risk of experiencing psychological distress and depressive symptoms following the infant's birth<sup>16-18</sup>. In addition to psychological distress, the birth of a preterm infant frequently has a substantial economic impact on the family involved<sup>19,20</sup>. All these factors that affect the life of the family can have negative consequences for the relationship between the parents.

A neurodevelopmental disability following a preterm birth could mediate, at least partly, the effect of preterm birth on parental separation. On the one hand, preterm births are indeed associated with a high risk of neurodevelopmental disabilities<sup>21,22</sup>. On the other hand, neurodevelopmental disabilities have been shown to be associated with an increased risk of parental separation<sup>23-30</sup>. However, no longitudinal study has investigated the complex relationships between low gestational age, neurodevelopmental outcome, and parental

---

<sup>1</sup> <http://www.insee.fr/en/methodes/default.asp?page=definitions/unite-urbaine.htm>. Date accessed: February 2016.

1  
2  
3 separation. The objective of this study was to investigate, in a large longitudinal population-  
4 based cohort of preterm infants, both the effects of low gestational age and the infant's  
5 neurodevelopmental outcome at two years of age on the risk of parental separation within  
6 seven years of giving birth.  
7  
8  
9  
10

## 11 12 **MATERIALS AND METHODS**

### 13 14 **Study population**

15  
16 The study population was composed of surviving preterm infants enrolled in the Loire  
17 Infant Follow-up Team (LIFT)<sup>31</sup>, born at less than 35 weeks of gestation between January  
18 2005 and December 2013, and who were evaluated at two years of corrected age to assess  
19 their neurodevelopmental outcomes (Figure 1). The LIFT network includes 24 maternity  
20 clinics in the Pays-de-la-Loire region (one of the 13 administrative regions in France) with the  
21 objective to screen for early clinical anomalies associated with preterm births and to provide  
22 specifically adapted care. The follow-up consisted of standardized visits by trained physicians  
23 at 3, 6, 9, 18, and 24 months as well as at 3, 4, 5, 6, and 7 years after the birth of the infant.  
24 Data used in this study were routinely collected (i.e. not collected for the purpose of the  
25 study).  
26  
27  
28  
29  
30  
31  
32  
33  
34  
35  
36  
37  
38  
39  
40

### 41 42 **Perinatal data**

43  
44 Perinatal data was comprised of the date of birth, gender, gestational age (GA), and  
45 birthweight. The birthweight Z-score was computed according to the Olsen standards<sup>32</sup>.  
46  
47  
48

### 49 50 **Parental situation**

51  
52 Information regarding relationship status was binary (i.e. as parents living together or  
53 parents living separately). For parents who had separated, the first date at which they were  
54 reported to be separated was used. Relationship status was not available at the time of  
55  
56  
57  
58  
59  
60

1  
2  
3 inclusion. Consequently, for the separations reported at the 3-month visit, there was the  
4  
5 possibility that the parents had already undergone separation at the time of the infant's birth.  
6  
7 Therefore, to ensure temporality between preterm birth and parental separation, separations  
8  
9 reported at the 3-month visit were excluded.  
10

### 11 12 **Neurodevelopmental outcome at two years**

13  
14  
15 Infants were evaluated at two years of corrected age. Assessment to define optimal and  
16  
17 non-optimal neurodevelopmental outcomes included a physical examination by a LIFT-  
18  
19 trained pediatrician, a psychomotor evaluation by a LIFT network psychologist, and a parent-  
20  
21 completed questionnaire. Neuromotor evaluation was regarded as non-optimal in case of  
22  
23 cerebral palsy or when the physical examination revealed relatively milder signs of abnormal  
24  
25 movement during independent walking according to the Amiel-Tison criteria<sup>33</sup>. Psychomotor  
26  
27 evaluation was assessed with the revised Brunet-Lézine test (four domains:  
28  
29 movement/posture, coordination, language, and socialization)<sup>34</sup>. The mean and maximal  
30  
31 global scores were 100 and 140, respectively, and values of <85 were considered non-optimal  
32  
33 psychomotor development. Infants who were not able to perform the revised Brunet-Lézine  
34  
35 test were considered to have non-optimal psychomotor development. Furthermore,  
36  
37 neurodevelopmental outcome was assessed with the parent-completed "Ages and Stages  
38  
39 Questionnaire" (ASQ)<sup>35,36</sup>. The ASQ assesses development in the following five areas:  
40  
41 communication, gross motor, fine motor, problem solving, and sociopersonal skills. The  
42  
43 maximal overall ASQ score is 300 and a score of <185 was considered non-optimal<sup>37</sup>. Finally,  
44  
45 sensory disabilities such as blindness or infants that required a hearing aid were taken into  
46  
47 account. Overall, infants with a non-optimal neuromotor and/or psychomotor assessment  
48  
49 and/or a sensory disability were regarded as having a "non-optimal neurodevelopmental  
50  
51 outcome." Infants without a documented physical examination or psychomotor assessment  
52  
53  
54  
55  
56  
57  
58  
59  
60



1  
2  
3 were considered as non-assessable at two years except for infants with severe neurological  
4 disabilities. This definition of non-optimality has been used in other studies<sup>38-40</sup>. To simplify  
5 matters, a non-optimal neurodevelopmental outcome will be referred to as non-optimality.  
6  
7  
8  
9

### 10 **Socioeconomic information**

11  
12 The socioeconomic data consisted of the socioeconomic level and eligibility for social  
13 security benefits for those with low incomes. The socioeconomic level took into account the  
14 parent with the more highly rated job according to a scale based on the official classification  
15 developed by the INSEE institute. The socioeconomic level and eligibility for social security  
16 benefits for those with low incomes were considered as two-level categorical variables.  
17  
18  
19  
20  
21  
22  
23  
24

### 25 **Urbanicity of the residential municipality**

26  
27 The residential municipality was considered either urban or rural based on definitions  
28 developed by the INSEE institute. Municipalities were considered rural or urban depending  
29 on the distance between buildings and the number of inhabitants.  
30  
31  
32  
33  
34

### 35 **Statistical analysis**

36  
37 The statistical analyses were conducted in three steps. Firstly, the crude associations  
38 between gestational age and non-optimality at 2 years and the risk of parental separation were  
39 investigated with Kaplan-Meier curves and log-rank tests.  
40  
41  
42  
43

44 Secondly, a mediation analysis was used to estimate the proportion of the effect of low  
45 gestational age on the risk of parental separation that was mediated by non-optimality at 2  
46 years. The aim of a mediation analysis is to decompose the effect of an exposure on an  
47 outcome into a direct effect and an indirect effect that is mediated by an intermediate variable  
48 (the mediator). Mediation analyses used were based on the counterfactual framework. A  
49 counterfactual variable describes what would have happened if we had intervened on  
50  
51  
52  
53  
54  
55  
56  
57  
58  
59  
60

1  
2  
3 exposure. This framework allows the decomposition of the causal effect into a so-called  
4  
5 natural direct and natural indirect effect. A natural direct effect measures the change in  
6  
7 outcome (the risk of parental separation) that would be observed if we could change the  
8  
9 exposure (low gestational age) but leave the mediator (optimality at 2 years) at the value it  
10  
11 naturally takes when the exposure is left unchanged. A natural indirect effect measures the  
12  
13 change in outcome (the risk of parental separation) that would be observed if we could change  
14  
15 the mediator (optimality at 2 years) as much as it would naturally change when exposure was  
16  
17 changed without actually changing the exposure (low gestational age). Gestational age was  
18  
19 considered as a three-level categorical variable: GA 32-34 (reference), GA 28-31 (very  
20  
21 preterm birth), and GA 24-27 weeks (extremely preterm birth). The estimations of natural  
22  
23 direct and indirect effects were done while adjusting for the possible confounding factors:  
24  
25 gender, multiple pregnancies (“yes” or “no”), Z-score of birthweight (<-1, between -1 and 0,  
26  
27 between 0 and 1, and  $\geq 1$ ), socioeconomic level (“high” or “intermediate”), social security  
28  
29 benefits for those with low incomes (“yes” or “no”), and urbanicity of the residential  
30  
31 municipality (“urban” versus “rural”). Moreover, this analysis accounted for the censored  
32  
33 nature of the outcome. The possible interaction between the exposure and the mediator was  
34  
35 tested. Mediation models used here are based on natural effect models<sup>41</sup> implemented in the R  
36  
37 package medflex.

38  
39  
40  
41  
42  
43 Thirdly, the effect of the non-optimality at 2 years on the risk of parental separation  
44  
45 was estimated using the multivariable Cox model. Furthermore, the effect of gestation age on  
46  
47 non-optimality at 2 years was estimated using logistic regression. For these two models, the  
48  
49 same adjustment variables as those considered in the mediation analysis were included in the  
50  
51 models. All analyses were performed using R software<sup>2</sup>.

52  
53  
54  
55 <sup>2</sup> R Core Team (2016). *R: A Language and Environment for Statistical Computing*. R  
56  
57 Foundation for Statistical Computing, Vienna, Austria. <http://www.R-project.org/>

1  
2  
3 Four sensitivity analyses were performed. In the first one, parental separations  
4 occurring before the 24-month visit were excluded to ensure the temporality between  
5 neurodevelopmental outcome and parental separations. In the second analysis, an imputation  
6 of the missing data was performed using a multiple imputation method. The third analysis  
7 concerned the comparison of the characteristics of the infants that were lost to follow-up  
8 between two and five years and those who were still followed at five years. Finally, a last  
9 analysis was performed by keeping only one infant from each twins' pair to check the  
10 robustness of the results regarding the assumption of non-independence between twins.  
11  
12  
13  
14  
15  
16  
17  
18  
19

### 20 **Ethic approval**

21  
22 Written consent was obtained for each patient before inclusion in the study, and the cohort  
23 was registered at the French data protection authority in clinical research ("Commission  
24 Nationale de l'Informatique et des Libertés" or CNIL, No. 851117).  
25  
26  
27  
28  
29

### 30 **RESULTS**

31  
32  
33 Between January 2005 and December 2013, 6,937 infants born at less than 35 weeks  
34 of gestation in the Pays-de-la-Loire region, France, were enrolled in the LIFT cohort. The  
35 following infants were excluded from the study population: infants whose parents were  
36 separated at the three-month (n=185) or 84-month visit (n=20), infants without  
37 neurodevelopmental evaluation at two years but still followed (n=392), and infants lost to  
38 follow-up at two years (n=315). In light of these exclusions, the study population consisted of  
39 5,732 preterm infants, corresponding to 83% of the infants initially enrolled in the cohort  
40 (Figure 1).  
41  
42  
43  
44  
45  
46  
47  
48  
49

50  
51 During the follow-up, 10.0% of the parents reported having undergone separation  
52 (n=572), corresponding with an incidence rate of 23.8 separations per 1000 infant-year. The  
53 median time at which separations were reported was 22 months following the birth of the  
54  
55  
56  
57  
58  
59  
60

1  
2  
3 infant with an interquartile range (IQR) of 10.3–43.3 months. 30.2% (n=1,730) and 8.9%  
4  
5 (n=508) of the infants were born very or extremely preterm, respectively. 19.1% (n=1,096) of  
6  
7 the infants were considered non-optimal at two years. Lastly, the median length of the total  
8  
9 follow-up was 56 months (IQR=32.1–69.2) (Table 1).  
10

11  
12 In the bivariable analysis, both gestational age and non-optimality at 2 years were  
13 associated with an increased risk of parental separation (Supplementary Table 1, Figure 2).  
14  
15 However, the mediation analysis showed that all the effect of low gestational age in very and  
16  
17 extremely preterm infants on the risk of parental separation was mediated by the non-  
18  
19 optimality at 2 years of age (Supplementary Figure 1). Preterm birth were associated with a  
20  
21 higher risk of non-optimal neurodevelopment at two years, corresponding to OR=2.1 [1.8,  
22  
23 2.4] and OR=4.2 [3.4, 5.2] for very and extremely preterm infants, respectively  
24  
25 (Supplementary Table 2). The non-optimality at 2 years was associated with an increased risk  
26  
27 of parental separation corresponding to a HR=1.49 [1.23, 1.80] (Table 2, Figure 3).  
28  
29 Furthermore, a significant interaction was found between non-optimality and social security  
30  
31 benefits due to low income on the risk of parental separation (Supplementary Table 3).  
32  
33 Finally, a lower parental socioeconomic level, receiving social security benefits due to low  
34  
35 income, and living in urban areas were associated with a higher risk of parental separation.  
36  
37 The AUC of this model was 0.69. The results of the relationships between gestational age,  
38  
39 non-optimality, and parental separation are summarized in Figure 3.  
40  
41  
42  
43  
44  
45

## 46 47 **DISCUSSION**

48  
49 Using a large population-based cohort study, we found that the effect of low  
50  
51 gestational age on the risk of parental separation was entirely mediated by the  
52  
53 neurodevelopmental outcome at two years. Parents of preterm infants with a non-optimal  
54  
55 neurodevelopment at two years were 50% more likely to have undergone separation in the  
56  
57

1  
2  
3 years following the birth of the infant, independently of the socio-economic factors. This  
4  
5 increased risk was further aggravated by low socio-economic conditions.  
6  
7

8 A strength of this study was the use of mediation analysis. Because of the association  
9  
10 between gestational age and neurodevelopmental outcome at two years, mediation analysis is  
11  
12 a relevant approach to investigate the effects of gestational age and neurodevelopmental  
13  
14 outcome on the risk of parental separation. An alternative approach would have been to build  
15  
16 a single model predicting parental separation with these two risk factors and the adjustment  
17  
18 variables. However, this model would not have accounted for the strong association between  
19  
20 gestational age and neurodevelopmental outcome and, therefore, could have led to biased  
21  
22 results. A further strength of this study was the large number of infants included, which  
23  
24 allowed a high statistical power to be attained. In addition, the longitudinal data and the  
25  
26 corresponding survival analyses allowed us to account for the timing of parental separations,  
27  
28 rather than simply distinguishing between whether the parents were living together or not.  
29  
30 Furthermore, the socio-economic factors known to influence the risk for parental separation  
31  
32 were taken into account. For infants whose parents underwent separation before the 24-month  
33  
34 visit (n=221), there was a doubt regarding the temporality between the neurodevelopmental  
35  
36 outcome and the parental separation. The sensitivity analysis showed that without these  
37  
38 infants, the results were exactly the same, probably due to the early occurrence of  
39  
40 neurodevelopment impairments during the infant's development (Supplementary Table 4).  
41  
42 Moreover, a sensitivity analysis was performed after imputation of the missing data (n=1,000)  
43  
44 using a multiple imputation method. The robustness of the results demonstrated the absence  
45  
46 of bias related to missing data (Supplementary Table 5). Finally, the analysis performed by  
47  
48 keeping only one infant from each twins' pair showed similar results (Supplementary Table  
49  
50  
51  
52  
53  
54  
55 6).

1  
2  
3 The present study has several limitations. Firstly, this study may underestimate the  
4 proportion of parental separation due to a bias in the declaration of relevant information; for  
5 example, during the examination of the infant by the pediatrician there could a degree of  
6 reluctance from the parents to reveal that they are no longer living together. In our study,  
7 12.3% of the parents were found to have undergone separation within an average follow-up  
8 time span of 5 years (including separations occurring at the 3-month and 84-month visits that  
9 were excluded from analyses). National statistics from the INSEE institute state that 9.9% of  
10 marriages entered into in the year 2000 ended in divorce within 5 years, suggesting that  
11 absence of bias in parental separation declaration. Secondly, the characteristics of infants that  
12 were excluded from the study population were not comparable to those who were included  
13 (Table 1). For example, late preterm infants born to families with a lower socioeconomic level  
14 were overrepresented in the category that was not included for the analysis. However, the  
15 absolute differences in the perinatal characteristics were rather small, thus indicating that  
16 inclusion criteria did not result in an obvious selection bias. Thirdly, given that the gestational  
17 age of our reference population was between 32 and 34 weeks, we cannot exclude the  
18 existence of a small effect of preterm birth on the risk of parental separation, albeit one that is  
19 not detectable with our study design. Further studies using a population of full-term infants as  
20 reference are needed to confirm our results. Fourthly, no information was available regarding  
21 the relationship between the parents before the birth of their infants. A very conflictual  
22 relationship might be associated with a higher risk of giving birth to a preterm infant. Our  
23 study could, therefore, overestimate the effect of a non-optimal neurodevelopment on the risk  
24 of parental separation. Fifthly, some factors that may be associated with parental separation  
25 were not available in this study and were thus not accounted for, such as the age of the parents  
26 or the number of children living in the household. Finally, some infants were lost between two  
27 and five years of follow-up (1,518 out of 4,813). These infants had slightly different

1  
2  
3 characteristics (Supplementary Table 7). However, no difference was observed for the  
4  
5 proportion of parents that underwent separation.  
6  
7

8 In the present study, optimality was defined using neuromotor, psychomotor, and  
9  
10 sensory evaluations, thereby revealing particularly severe pathologies or clinical symptoms.  
11  
12 The association between optimality and parental separation is in accordance with the results  
13  
14 of previous studies demonstrating negative consequences on the parent's relationship in case  
15  
16 of a severe disease<sup>24-26</sup>. Interestingly, parents of extremely preterm infants with an optimal  
17  
18 neurodevelopment at two years did not have a higher risk of separation. The increased risk of  
19  
20 separation by parents of VLBW (<1500g)<sup>42</sup> in a US national survey conducted on 6,016  
21  
22 births might be due to the fact that occurrences of disability were not taken into account  
23  
24 during the follow-up. Therefore, we agree with the authors' statement that their values may be  
25  
26 regarded as conservative estimates of the effect of infant disability on parental separation.  
27  
28 While a preterm birth may not, on average, be directly responsible for the disruption of a  
29  
30 couple's relationship, the discovery of associated severe infant disabilities or  
31  
32 neurodevelopmental delays could profoundly challenge the parent's relationship. The  
33  
34 increased risk of parental separation seems to be due to the presence of repeated stressful  
35  
36 events within the first years of the infant's life. Lastly, this study provides evidence for a  
37  
38 major impact of socioeconomic factors on the risk of parental separation. This result is in  
39  
40 accordance with several studies that showed no or limited parental education and low family  
41  
42 income are strong risk factors for separation<sup>26,29,43,44</sup>, for parental stress<sup>13-15</sup>, and for  
43  
44 psychological distress<sup>16</sup>.  
45  
46  
47  
48  
49

## 50 51 **CONCLUSIONS**

52  
53 The effect of low gestational age on the risk of parental separation was mediated by  
54  
55 the infant's neurodevelopment, with 50% more separations among parents of infants with  
56  
57

1  
2  
3 non-optimal neurodevelopment. This increased risk was aggravated by low socio-economic  
4  
5 conditions.  
6  
7

### 8 **Funding source**

9  
10  
11 This work was supported by grants from the Regional Health Agency of Pays de la Loire. The  
12  
13 sponsor had no role in this manuscript.  
14

### 15 **Declaration of interest**

16  
17 The authors have declared that they have no conflict of interest  
18  
19

### 20 **Author's contributions**

21  
22  
23  
24  
25 Matthieu Hanf had the original idea, provided guidance for the statistical analysis and  
26  
27 reviewed and revised the manuscript. Simon Nusinovici performed the statistical analysis, the  
28  
29 literature searches and wrote the paper. Jean-Baptiste Müller, Géraldine Gascoin, Hélène  
30  
31 Basset, Cyril Flamant, Bertrand Olliac, Valérie Rouger, Charlotte Bouvard and Jean-  
32  
33 Christophe Rozé participated to the data collection, reviewed and revised the manuscript.  
34  
35 Marion Pérennec participated to the analysis and interpretation of the data, reviewed and  
36  
37 revised the manuscript. All the authors approved the final manuscript as submitted and agree  
38  
39 to be accountable for all aspects of the work.  
40  
41  
42

### 43 **Data sharing statement:**

44  
45  
46  
47 Data are available from the scientific Committee of the LIFT cohort for researchers who meet  
48  
49 the criteria for access to confidential health data. Interested researchers have to comply with  
50  
51 the French legislation i.e. require the advice of the “Comité consultatif sur le traitement de  
52  
53 l’information en matière de recherché sur le domaine de la santé” (CCTIRS) as well as the  
54  
55 authorization of the “Commission nationale de l’information et des libertés” (CNIL) for the  
56  
57



1  
2  
3  
4  
5  
6  
7  
8  
9  
10  
11  
12  
13  
14  
15  
16  
17  
18  
19  
20  
21  
22  
23  
24  
25  
26  
27  
28  
29  
30  
31  
32  
33  
34  
35  
36  
37  
38  
39  
40  
41  
42  
43  
44  
45  
46  
47  
48  
49  
50  
51  
52  
53  
54  
55  
56  
57  
58  
59  
60

treatment of personal health data. Research projects have also to be approved by an independent Ethics Committee. Contact information is available at: <http://www.reseausnaissance.fr/module-pagesetter-viewpub-tid-2-pid-21.html>

For peer review only

## REFERENCES

1. Amato PR, Keith B. Parental divorce and the well-being of children: a meta-analysis. *Psychol Bull.* 1991;110(1):26-46.
2. Allison PD, Furstenberg FF. How marital dissolution affects children: variations by age and sex. *Developmental Psychology.* 1989;25:540-549.
3. Lansford JE, Malone PS, Castellino DR, Dodge KA, Pettit GS, Bates JE. Trajectories of internalizing, externalizing, and grades for children who have and have not experienced their parents' divorce or separation. *J Fam Psychol JFP J Div Fam Psychol Am Psychol Assoc Div 43.* 2006;20(2):292-301. doi:10.1037/0893-3200.20.2.292.
4. Richards M, Wadsworth MEJ. Long term effects of early adversity on cognitive function. *Arch Dis Child.* 2004;89(10):922-927. doi:10.1136/adc.2003.032490.
5. Amato PR, Keith B. Parental divorce and adult well-being: a meta-analysis. *Journal of Marriage and the Family.* 1991;53:43-58.
6. Hope S, Power C, Rodgers B. The relationship between parental separation in childhood and problem drinking in adulthood. *Addict Abingdon Engl.* 1998;93(4):505-514.
7. Meyer EC, Garcia Coll CT, Seifer R, Ramos A, Kilis E, Oh W. Psychological distress in mothers of preterm infants. *J Dev Behav Pediatr JDBP.* 1995;16(6):412-417.
8. Younger JB, Kendell MJ, Pickler RH. Mastery of stress in mothers of preterm infants. *J Soc Pediatr Nurses JSPN.* 1997;2(1):29-35.
9. Trombini E, Surcinelli P, Piccioni A, Alessandrini R, Faldella G. Environmental factors associated with stress in mothers of preterm newborns. *Acta Paediatr Oslo Nor 1992.* 2008;97(7):894-898. doi:10.1111/j.1651-2227.2008.00849.x.
10. Singer LT, Salvator A, Guo S, Collin M, Lilien L, Baley J. Maternal psychological distress and parenting stress after the birth of a very low-birth-weight infant. *JAMA.* 1999;281(9):799-805.
11. Schappin R, Wijnroks L, Uniken Venema MMAT, Jongmans MJ. Rethinking stress in parents of preterm infants: a meta-analysis. *PloS One.* 2013;8(2):e54992. doi:10.1371/journal.pone.0054992.
12. Zerach G, Elsayag A, Shefer S, Gabis L. Long-Term Maternal Stress and Post-traumatic Stress Symptoms Related to Developmental Outcome of Extremely Premature Infants. *Stress Health J Int Soc Investig Stress.* 2015;31(3):204-213. doi:10.1002/smi.2547.
13. Singer LT, Fulton S, Kirchner HL, et al. Parenting very low birth weight children at school age: maternal stress and coping. *J Pediatr.* 2007;151(5):463-469. doi:10.1016/j.jpeds.2007.04.012.
14. Tommiska V, Ostberg M, Fellman V. Parental stress in families of 2 year old extremely low birthweight infants. *Arch Dis Child Fetal Neonatal Ed.* 2002;86(3):F161-164.

15. Wormald F, Tapia JL, Torres G, et al. Stress in parents of very low birth weight preterm infants hospitalized in neonatal intensive care units. A multicenter study. *Arch Argent Pediatr*. 2015;113(4):303-309. doi:10.1590/S0325-00752015000400005.
16. Davis L, Edwards H, Mohay H, Wollin J. The impact of very premature birth on the psychological health of mothers. *Early Hum Dev*. 2003;73(1-2):61-70.
17. Miles MS, Holditch-Davis D, Schwartz TA, Scher M. Depressive symptoms in mothers of prematurely born infants. *J Dev Behav Pediatr JDBP*. 2007;28(1):36-44. doi:10.1097/01.DBP.0000257517.52459.7a.
18. Pace CC, Spittle AJ, Molesworth CM-L, et al. Evolution of Depression and Anxiety Symptoms in Parents of Very Preterm Infants During the Newborn Period. *JAMA Pediatr*. July 2016. doi:10.1001/jamapediatrics.2016.0810.
19. McCormick MC, Bernbaum JC, Eisenberg JM, Kustra SL, Finnegan E. Costs incurred by parents of very low birth weight infants after the initial neonatal hospitalization. *Pediatrics*. 1991;88(3):533-541.
20. Kusters CDJ, van der Pal SM, van Steenbrugge GJ, den Ouden LS, Kollée LAA. [The impact of a premature birth on the family; consequences are experienced even after 19 years]. *Ned Tijdschr Geneesk*. 2013;157(25):A5449.
21. Bhutta AT, Cleves MA, Casey PH, Cradock MM, Anand KJS. Cognitive and behavioral outcomes of school-aged children who were born preterm: a meta-analysis. *JAMA*. 2002;288(6):728-737.
22. Saigal S, Doyle LW. An overview of mortality and sequelae of preterm birth from infancy to adulthood. *Lancet Lond Engl*. 2008;371(9608):261-269. doi:10.1016/S0140-6736(08)60136-1.
23. Reichman NE, Corman H, Noonan K. Impact of child disability on the family. *Matern Child Health J*. 2008;12(6):679-683. doi:10.1007/s10995-007-0307-z.
24. Joesch JM, Smith KR. Children's health and their mothers' risk of divorce or separation. *Soc Biol*. 1997;44(3-4):159-169.
25. Tew BJ, Laurence KM, Payne H, Rawnsley K. Marital stability following the birth of a child with spina bifida. *Br J Psychiatry J Ment Sci*. 1977;131:79-82.
26. Reichman NE, Corman H, Noonan K. Effects of child health on parents' relationship status. *Demography*. 2004;41(3):569-584.
27. Hartley SL, Barker ET, Seltzer MM, et al. The relative risk and timing of divorce in families of children with an autism spectrum disorder. *J Fam Psychol JFP J Div Fam Psychol Am Psychol Assoc Div 43*. 2010;24(4):449-457. doi:10.1037/a0019847.
28. Lederman VRG, Alves B dos S, Negrão J, et al. Divorce in families of children with Down Syndrome or Rett Syndrome. *Ciênc Saúde Coletiva*. 2015;20(5):1363-1369. doi:10.1590/1413-81232015205.13932014.

- 1  
2  
3  
4  
5  
6  
7  
8  
9  
10  
11  
12  
13  
14  
15  
16  
17  
18  
19  
20  
21  
22  
23  
24  
25  
26  
27  
28  
29  
30  
31  
32  
33  
34  
35  
36  
37  
38  
39  
40  
41  
42  
43  
44  
45  
46  
47  
48  
49  
50  
51  
52  
53  
54  
55  
56  
57  
58  
59  
60
29. Lau S, Lu X, Balsamo L, et al. Family life events in the first year of acute lymphoblastic leukemia therapy: a children's oncology group report. *Pediatr Blood Cancer*. 2014;61(12):2277-2284. doi:10.1002/pbc.25195.
  30. Mauldon J. Children's Risks of Experiencing Divorce and Remarriage: Do Disabled Children Destabilize Marriages? *Popul Stud J Demogr*. 1992;46(2):349-362. doi:10.1080/0032472031000146276.
  31. Hanf M, Nusinovici S, Rouger V, et al. Cohort Profile: Longitudinal study of preterm infants in the Pays de la Loire region of France (LIFT cohort). *Int J Epidemiol*. July 2017. doi:10.1093/ije/dyx110.
  32. Olsen IE, Groveman SA, Lawson ML, Clark RH, Zemel BS. New intrauterine growth curves based on United States data. *Pediatrics*. 2010;125(2):e214-224. doi:10.1542/peds.2009-0913.
  33. Amiel-Tison C. Update of the Amiel-Tison neurologic assessment for the term neonate or at 40 weeks corrected age. *Pediatr Neurol*. 2002;27(3):196-212.
  34. Josse D. Revised Brunet-Lezine scale of psychomotor development of first childhood [in French]. *Etablissement D'Applications Psychotech Paris Fr*. 1997.
  35. Squires J, Bricker D, Potter L. Revision of a parent-completed development screening tool: Ages and Stages Questionnaires. *J Pediatr Psychol*. 1997;22(3):313-328.
  36. Skellern CY, Rogers Y, O'Callaghan MJ. A parent-completed developmental questionnaire: follow up of ex-premature infants. *J Paediatr Child Health*. 2001;37(2):125-129.
  37. Flamant C, Branger B, Nguyen The Tich S, et al. Parent-completed developmental screening in premature children: a valid tool for follow-up programs. *PloS One*. 2011;6(5):e20004. doi:10.1371/journal.pone.0020004.
  38. Gouin M, Nguyen S, Savagner C, et al. Severe bronchiolitis in infants born very preterm and neurodevelopmental outcome at 2 years. *Eur J Pediatr*. 2013;172(5):639-644. doi:10.1007/s00431-013-1940-8.
  39. Leroux BG, N'Guyen The Tich S, Branger B, et al. Neurological assessment of preterm infants for predicting neuromotor status at 2 years: results from the LIFT cohort. *BMJ Open*. 2013;3(2):e002431-e002431. doi:10.1136/bmjopen-2012-002431.
  40. Gouin M, Flamant C, Gascoin G, et al. The Association of Urbanicity with Cognitive Development at Five Years of Age in Preterm Children. Carpenter DO, ed. *PLOS ONE*. 2015;10(7):e0131749. doi:10.1371/journal.pone.0131749.
  41. Lange T, Vansteelandt S, Bekaert M. A simple unified approach for estimating natural direct and indirect effects. *Am J Epidemiol*. 2012;176(3):190-195. doi:10.1093/aje/kwr525.

- 1  
2  
3 42. Swaminathan S, Alexander GR, Boulet S. Delivering a very low birth weight infant and  
4 the subsequent risk of divorce or separation. *Matern Child Health J.* 2006;10(6):473-  
5 479. doi:10.1007/s10995-006-0146-3.  
6  
7 43. Jena AB, Goldman DP, Joyce G. Association between the birth of twins and parental  
8 divorce. *Obstet Gynecol.* 2011;117(4):892-897. doi:10.1097/AOG.0b013e3182102adf.  
9  
10 44. Urbano RC, Hodapp RM. Divorce in families of children with Down syndrome: a  
11 population-based study. *Am J Ment Retard AJMR.* 2007;112(4):261-274.  
12 doi:10.1352/0895-8017(2007)112[261:DIFOCW]2.0.CO;2.  
13  
14  
15  
16  
17  
18  
19  
20  
21  
22  
23  
24  
25  
26  
27  
28  
29  
30  
31  
32  
33  
34  
35  
36  
37  
38  
39  
40  
41  
42  
43  
44  
45  
46  
47  
48  
49  
50  
51  
52  
53  
54  
55  
56  
57  
58  
59  
60

For peer review only

**Table 1.** Descriptive characteristics of the study population and comparison between preterm infants included in the study and those not included.

| Variable                                       | Category     | Included<br>(n=5,732) | Not included<br>(n=1,205) | P value |
|------------------------------------------------|--------------|-----------------------|---------------------------|---------|
|                                                |              | Number (%)            | Number (%)                |         |
| Gestational age (weeks)                        | 32–34        | 3,494 (61.0)          | 802 (66.6)                | < 0.001 |
|                                                | 28–31        | 1,730 (30.2)          | 321 (26.6)                |         |
|                                                | 24–27        | 508 (8.9)             | 82 (6.8)                  |         |
| Gender                                         | Female       | 2,640 (46.1)          | 589 (48.9)                | 0.079   |
|                                                | Male         | 3,092 (53.9)          | 616 (51.1)                |         |
| Multiple pregnancy                             | No           | 3,617 (63.1)          | 830 (68.9)                | < 0.001 |
|                                                | Yes          | 2,115 (36.9)          | 375 (31.1)                |         |
| Z score of birth weight                        | <-1          | 1,378 (24.0)          | 285 (23.9)                | 0.999   |
|                                                | -1 to 0      | 2,044 (35.7)          | 426 (35.7)                |         |
|                                                | 0 to 1       | 1,787 (31.2)          | 371 (31.1)                |         |
|                                                | >1           | 523 (9.1)             | 110 (9.2)                 |         |
| Socio-economic level                           | Intermediate | 4,254 (74.2)          | 1,024 (85.0)              | < 0.001 |
|                                                | High         | 1,478 (25.8)          | 181 (15.0)                |         |
| Social security benefits due to low income     | No           | 5,031 (87.8)          | 968 (80.3)                | < 0.001 |
|                                                | Yes          | 701 (12.2)            | 237 (19.7)                |         |
| Urbanicity                                     | Rural        | 2,104 (36.7)          | 376 (31.2)                | < 0.001 |
|                                                | Urban        | 3,628 (63.3)          | 829 (68.8)                |         |
| Length of follow-up (months)<br>[Median (IQR)] |              | 56 [32.1, 69.2]       | 16.6 [8.1, 56.9]          | < 0.001 |

IQR: interquartile range

**Table 2.** Crude and adjusted association between the neurodevelopment of preterm infants and the risk of parental separation. Adjustment was made on perinatal characteristics of the infants, the socio-economic level of the family, and the urbanicity of the residential municipality (n=5,732).

|                                                  | Category     | N (%)        | Raw HR<br>[95% CI] | Adjusted HR<br>[95% CI] |
|--------------------------------------------------|--------------|--------------|--------------------|-------------------------|
| Optimality at 2 years*                           | Yes          | 4,636 (80.9) | 1                  | 1                       |
|                                                  | No           | 1,096 (19.1) | 1.58 [1.31, 1.90]  | 1.49 [1.23, 1.80]       |
| Gender                                           | Female       | 2,640 (46.1) | 1                  | 1                       |
|                                                  | Male         | 3,092 (53.9) | 1.07 [0.90, 1.26]  | 1.07 [0.91, 1.27]       |
| Multiple pregnancy                               | No           | 3,617 (63.1) | 1                  | 1                       |
|                                                  | Yes          | 2,115 (36.9) | 0.94 [0.79, 1.11]  | 0.97 [0.81, 1.15]       |
| Z score of birthweight                           | <-1          | 1,378 (24.0) | 1                  | 1                       |
|                                                  | -1 to 0      | 2,044 (35.7) | 1.03 [0.84, 1.28]  | 1.1 [0.89, 1.36]        |
|                                                  | 0 to 1       | 1,787 (31.2) | 0.9 [0.72, 1.12]   | 0.96 [0.77, 1.20]       |
|                                                  | >1           | 523 (9.1)    | 0.96 [0.70, 1.33]  | 1.03 [0.75, 1.43]       |
| Socio-economic level                             | Intermediate | 4,254 (74.2) | 1                  | 1                       |
|                                                  | High         | 1,478 (25.8) | 0.62 [0.50, 0.76]  | 0.64 [0.52, 0.79]       |
| Social security benefits (SSB) due to low income | No           | 5,031 (87.8) | 1                  | 1                       |
|                                                  | Yes          | 701 (12.2)   | 4.09 [3.43, 4.86]  | 3.68 [3.09, 4.39]       |
| Urbanicity                                       | Rural        | 2,104 (36.7) | 1                  | 1                       |
|                                                  | Urban        | 3,628 (63.3) | 1.91 [1.57, 2.31]  | 1.81 [1.49, 2.20]       |

HR: hazards ratio; CI: confidence interval

\* Infants with a non-optimal neuromotor and/or psychomotor assessment and/or sensorial disability at two years were considered as non-optimal.

1  
2  
3 **Figure's caption**  
4  
5

6 **Figure 1.** Flowchart  
7

8 WG: weeks of gestation; PDL: Pays-de-la-Loire region; LIFT: Loire Infant Follow-up Team.  
9

10  
11 **Figure 2.** Relationship between the neurodevelopment of preterm infants and the occurrence  
12 of parental separation, using Kaplan-Meier curves (n=5,732).  
13

14 **Figure 3.** Summary of the relationships between low gestational age, neurodevelopment of  
15 preterm infants (non-optimality at two years), and the risk of parental separation.  
16

17 \*SSB: Social security benefits due to low income; ZS: Z-score.  
18

19  
20 Odds ratio (OR) and hazard ratio (HR) were estimated using two different models (because of the  
21 absence of direct effect of low gestational age on the risk of parental separation). Model 1: logistic  
22 regression with outcome = non-optimality at two years and exposure = gestational age. Model 2: Cox  
23 model with outcome = parental separation and exposure = non-optimality at two years. Adjustment  
24 variables for both models: gender, multiple pregnancies, Z-score of birthweight, socioeconomic level,  
25 social security benefits for those with low incomes, and urbanicity of the residential municipality.  
26 Only significant adjustment variables were reported in this figure.  
27  
28  
29  
30  
31  
32  
33  
34  
35  
36  
37  
38  
39  
40  
41  
42  
43  
44  
45  
46  
47  
48  
49  
50  
51  
52  
53  
54  
55  
56  
57  
58  
59  
60



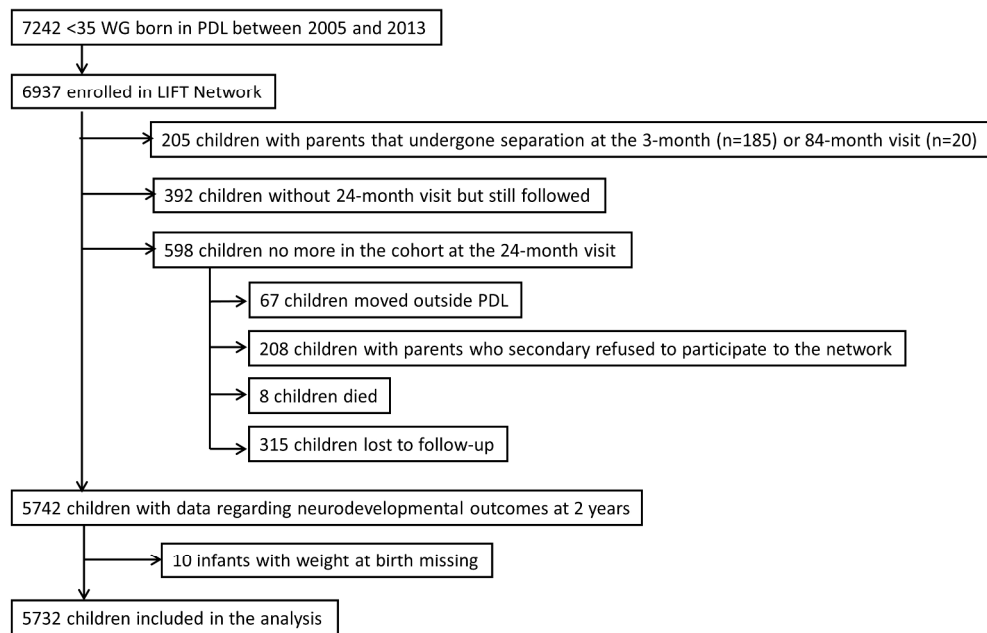

Figure 1. Flowchart

WG: weeks of gestation; PDL: Pays-de-la-Loire region; LIFT: Loire Infant Follow-up Team.

250x162mm (300 x 300 DPI)

1  
2  
3  
4  
5  
6  
7  
8  
9  
10  
11  
12  
13  
14  
15  
16  
17  
18  
19  
20  
21  
22  
23  
24  
25  
26  
27  
28  
29  
30  
31  
32  
33  
34  
35  
36  
37  
38  
39  
40  
41  
42  
43  
44  
45  
46  
47  
48  
49  
50  
51  
52  
53  
54  
55  
56  
57  
58  
59  
60

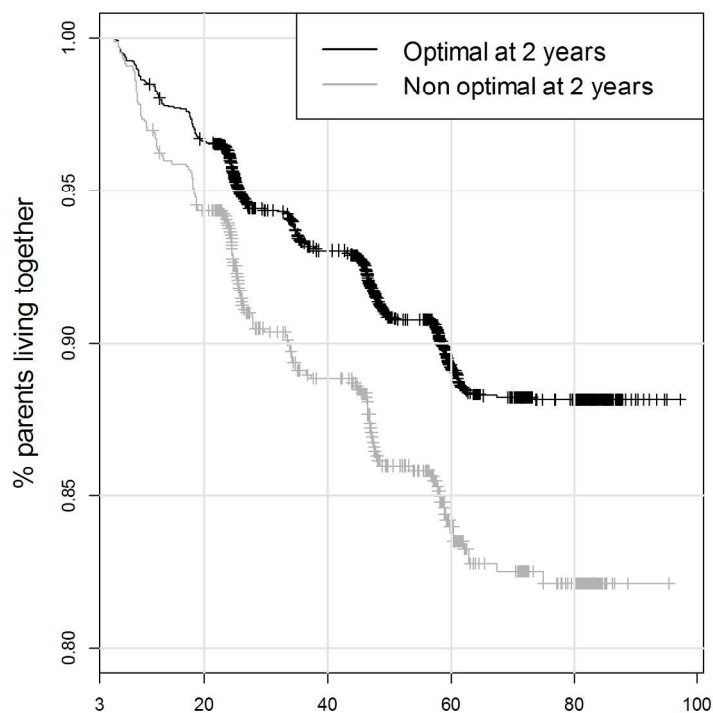

| N at risk              | Number of month since 3-month visit |      |      |      |     |
|------------------------|-------------------------------------|------|------|------|-----|
|                        | 3                                   | 20   | 40   | 60   | 80  |
| Optimal at 2 years     | 4636                                | 4406 | 3248 | 1755 | 543 |
| Non-optimal at 2 years | 1096                                | 1004 | 694  | 335  | 119 |

Figure 2. Relationship between the neurodevelopment of preterm infants and the occurrence of parental separation, using Kaplan-Meier curves (n=5,732).

193x171mm (300 x 300 DPI)

only

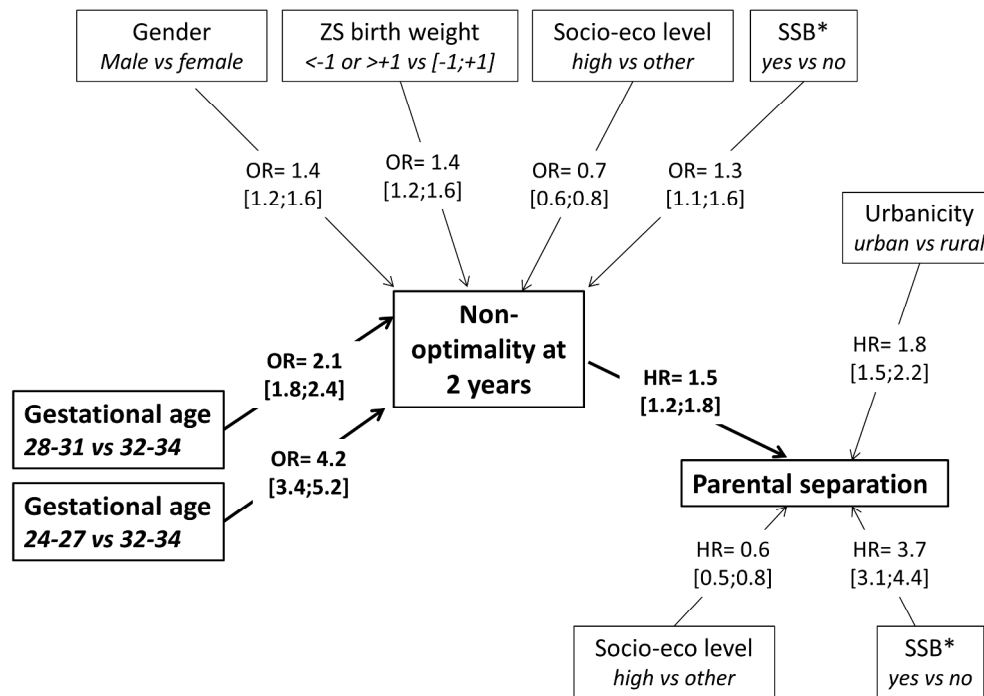

Figure 3. Summary of the relationships between low gestational age, neurodevelopment of preterm infants (non-optimality at two years), and the risk of parental separation.

\*SSB: Social security benefits due to low income; ZS: Z-score.

Odds ratio (OR) and hazard ratio (HR) were estimated using two different models (because of the absence of direct effect of low gestational age on the risk of parental separation). Model 1: logistic regression with outcome = non-optimality at two years and exposure = gestational age. Model 2: Cox model with outcome = parental separation and exposure = non-optimality at two years. Adjustment variables for both models: gender, multiple pregnancies, Z-score of birthweight, socioeconomic level, social security benefits for those with low incomes, and urbanicity of the residential municipality. Only significant adjustment variables were reported in this figure.

242x171mm (300 x 300 DPI)

Supplementary materials

**Supplementary Figure 1.** Decomposition of the effect of low gestational age on the risk of parental separation into a direct effect and an indirect effect mediated by the neurodevelopment of preterm infants (non-optimality at two years). This mediation model was adjusted for gender, multiple pregnancy, Z-score of birthweight, socioeconomic level, social security benefits for those with low incomes, and urbanicity of the residential municipality.

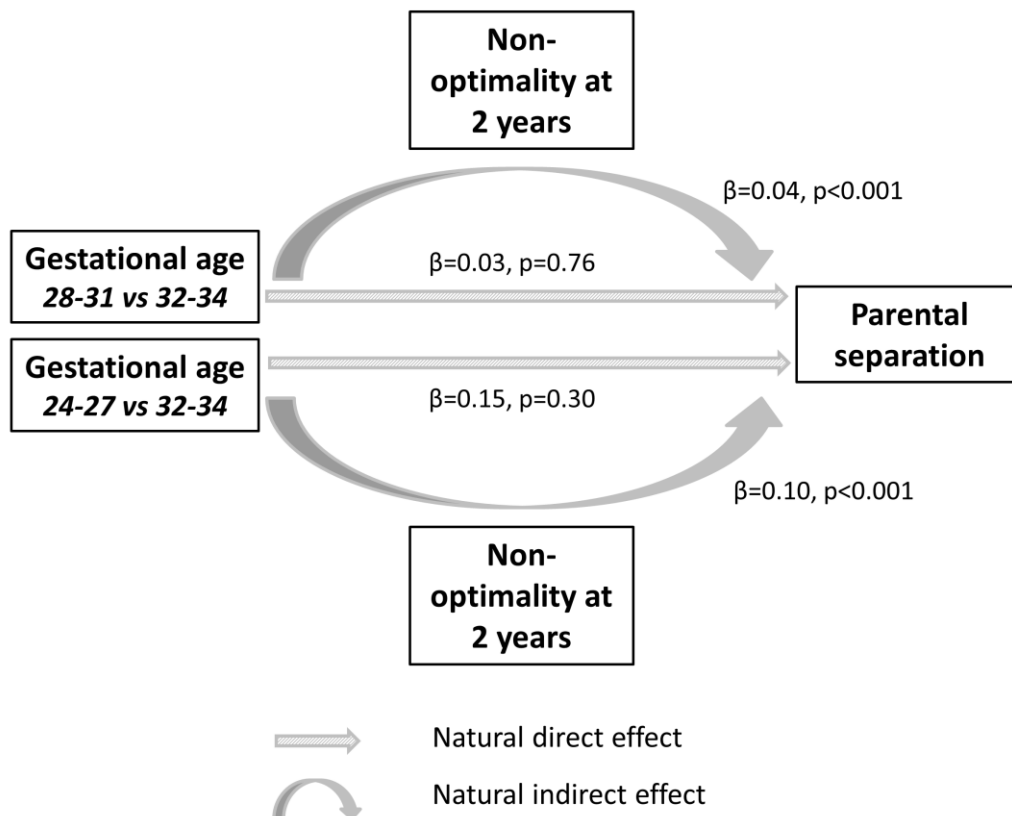

**Supplementary Table 1.** Incidence risks and incidence rates of parental separation in preterm infants population according to the perinatal characteristics of the child, the socio-economic level of the family and the urbanicity of the residential municipality (n=5,732).

| Variable                                   | Category     | Incidence risk of parental separation (N events/N at risk) x 100 | Incidence rate of parental separation for 1000 children-year | P value** |
|--------------------------------------------|--------------|------------------------------------------------------------------|--------------------------------------------------------------|-----------|
| Gestational age (weeks)                    | 32–34        | 9.6                                                              | 22.6                                                         | 0.030     |
|                                            | 28–31        | 9.9                                                              | 24.1                                                         |           |
|                                            | 24–27        | 13.0                                                             | 31.6                                                         |           |
| Optimality at 2 years*                     | Yes          | 9.2                                                              | 21.5                                                         | < 0.001   |
|                                            | No           | 13.4                                                             | 34.2                                                         |           |
| Gender                                     | Female       | 9.6                                                              | 23.0                                                         | 0.450     |
|                                            | Male         | 10.3                                                             | 24.5                                                         |           |
| Multiple pregnancy                         | No           | 10.2                                                             | 24.3                                                         | 0.460     |
|                                            | Yes          | 9.6                                                              | 22.9                                                         |           |
| Z score of birthweight                     | <-1          | 10.3                                                             | 24.3                                                         | 0.570     |
|                                            | -1 to 0      | 10.5                                                             | 25.3                                                         |           |
|                                            | 0 to 1       | 9.2                                                              | 21.8                                                         |           |
|                                            | >1           | 9.6                                                              | 23.5                                                         |           |
| Socio-economic level                       | Intermediate | 10.8                                                             | 26.7                                                         | < 0.001   |
|                                            | High         | 7.5                                                              | 16.4                                                         |           |
| Social security benefits due to low income | No           | 7.6                                                              | 17.7                                                         | < 0.001   |
|                                            | Yes          | 27.4                                                             | 73.6                                                         |           |
| Urbanicity                                 | Rural        | 6.6                                                              | 15.2                                                         | < 0.001   |
|                                            | Urban        | 12.0                                                             | 29.1                                                         |           |

\*Children with a non-optimal neuromotor and/or psychomotor assessment and/or sensorial disability at two years were considered as non-optimal.

\*\*log-rank test

**Supplementary Table 2.** Adjusted associations between the risk of non-optimal neurodevelopment at two years and gestational age with adjustment variables for preterm infants born between 2005 and 2013 followed in the LIFT cohort (n=5,732).

| Variable                                         | Category     | N (%)        | Adjusted OR<br>[95%CI] |
|--------------------------------------------------|--------------|--------------|------------------------|
| Gestational age (weeks)                          | 32–34        | 3,494 (61.0) | 1                      |
|                                                  | 28–31        | 1,730 (30.2) | 2.06 [1.78, 2.39]      |
|                                                  | 24–27        | 508 (8.9)    | 4.23 [3.43, 5.20]      |
| Gender                                           | Female       | 2,640 (46.1) | 1                      |
|                                                  | Male         | 3,092 (53.9) | 1.38 [1.2, 1.59]       |
| Multiple pregnancy                               | No           | 3,617 (63.1) | 1                      |
|                                                  | Yes          | 2,115 (36.9) | 0.94 [0.82, 1.09]      |
| Z score of birthweight                           | <-1          | 1,378 (24.0) | 1                      |
|                                                  | -1 to 0      | 2,044 (35.7) | 0.73 [0.61, 0.87]      |
|                                                  | 0 to 1       | 1,787 (31.2) | 0.72 [0.6, 0.87]       |
|                                                  | >1           | 523 (9.1)    | 0.99 [0.77, 1.26]      |
| Socio-economic level                             | Intermediate | 4,254 (74.2) | 1                      |
|                                                  | High         | 1,478 (25.8) | 0.72 [0.61, 0.85]      |
| Social security benefits (SSB) due to low income | No           | 5,031 (87.8) | 1                      |
|                                                  | Yes          | 701 (12.2)   | 1.31 [1.07, 1.59]      |
| Urbanicity                                       | Rural        | 2,104 (36.7) | 1                      |
|                                                  | Urban        | 3,628 (63.3) | 0.90 [0.78, 1.04]      |

OR: odds ratio; CI: confidence interval.

**Supplementary Table 3.** Crude and adjusted associations between the risk of parental separation and neurodevelopment of preterm infants (optimality at two years) with adjustment variables and interaction term between optimality at two years and social security benefits due to low income (n=5,732).

| Variable                                         | Category     | N (%)        | Adjusted HR<br>[95% CI] |
|--------------------------------------------------|--------------|--------------|-------------------------|
| Optimality at 2 years*                           | Yes          | 4,636 (80.9) | 1                       |
|                                                  | No           | 1,096 (19.1) | 1.27 [0.99, 1.63]       |
| Gender                                           | Female       | 2,640 (46.1) | 1                       |
|                                                  | Male         | 3,092 (53.9) | 1.07 [0.91, 1.26]       |
| Multiple pregnancy                               | No           | 3,617 (63.1) | 1                       |
|                                                  | Yes          | 2,115 (36.9) | 0.96 [0.81, 1.14]       |
| Z score of birthweight                           | <-1          | 1,378 (24.0) | 1                       |
|                                                  | -1 to 0      | 2,044 (35.7) | 1.10 [0.89, 1.36]       |
|                                                  | 0 to 1       | 1,787 (31.2) | 0.97 [0.77, 1.21]       |
|                                                  | >1           | 523 (9.1)    | 1.04 [0.76, 1.44]       |
| Socio-economic level                             | Intermediate | 4,254 (74.2) | 1                       |
|                                                  | High         | 1,478 (25.8) | 0.64 [0.52, 0.79]       |
| Social security benefits (SSB) due to low income | No           | 5,031 (87.8) | 1                       |
|                                                  | Yes          | 701 (12.2)   | 3.27 [2.65, 4.04]       |
| Urbanicity                                       | Rural        | 2,104 (36.7) | 1                       |
|                                                  | Urban        | 3,628 (63.3) | 1.80 [1.49, 2.19]       |
| Optimality at 2 years * SSB                      | Yes * No     | 4,102 (71.6) | 1                       |
|                                                  | No * Yes     | 167 (2.9)    | 1.52 [1.03, 2.23]       |

HR: hazards ratio; SSB: social security benefits; CI: confidence interval.

\*Children with a non-optimal neuromotor and/or psychomotor assessment and/or sensorial disability at two years were considered as non-optimal.

**Supplementary Table 4.** Adjusted associations between the risk of parental separation occurring from the 24-month visit and neurodevelopment of preterm infants (optimality at two years) with adjustment variables (n=5,511). In this analysis, the separations occurring between the 6-month and the 18-month visit were excluded.

|                                                  | Category     | N (%)        | Adjusted HR<br>[95% CI] |
|--------------------------------------------------|--------------|--------------|-------------------------|
| Optimality at 2 years*                           | Yes          | 4,477 (81.2) | 1                       |
|                                                  | No           | 1,034 (18.8) | 1.49 [1.17, 1.91]       |
| Gender                                           | Female       | 2,549 (46.3) | 1                       |
|                                                  | Male         | 2,962 (53.7) | 0.98 [0.79, 1.21]       |
| Multiple pregnancy                               | No           | 3,479 (63.1) | 1                       |
|                                                  | Yes          | 2,032 (36.9) | 0.90 [0.72, 1.13]       |
| Z score of birthweight                           | <-1          | 1,326 (24.1) | 1                       |
|                                                  | -1 to 0      | 1,952 (35.4) | 1.01 [0.77, 1.32]       |
|                                                  | 0 to 1       | 1,729 (31.4) | 0.98 [0.74, 1.30]       |
|                                                  | >1           | 504 (9.1)    | 1.02 [0.68, 1.54]       |
| Socio-economic level                             | Intermediate | 4,068 (73.8) | 1                       |
|                                                  | High         | 1,443 (26.2) | 0.67 [0.52, 0.87]       |
| Social security benefits (SSB) due to low income | No           | 4,903 (89.0) | 1                       |
|                                                  | Yes          | 608 (11.0)   | 3.01 [2.38, 3.81]       |
| Urbanicity                                       | Rural        | 2,054 (37.3) | 1                       |
|                                                  | Urban        | 3,457 (62.7) | 1.82 [1.43, 2.32]       |

HR: hazards ratio; CI: confidence interval.

\*Children with a non-optimal neuromotor and/or psychomotor assessment and/or sensorial disability at two years were considered as non-optimal.



**Supplementary Table 5.** Adjusted associations between the risk of parental separation and neurodevelopment of preterm infants (optimality at two years) with adjustment variables after imputation of missing values (13 infants with weight at birth missing and 990 infants with neurodevelopmental outcome at two years missing) using the multiple imputation method (n=6,732).

| Variable                                   | Category     | Adjusted HR<br>[95% CI] |
|--------------------------------------------|--------------|-------------------------|
| Optimality at 2 years*                     | Yes          | 1                       |
|                                            | No           | 1.45 [1.21, 1.73]       |
| Gender                                     | Female       | 1                       |
|                                            | Male         | 1.06 [0.91, 1.24]       |
| Multiple pregnancy                         | No           | 1                       |
|                                            | Yes          | 0.97 [0.83, 1.14]       |
| Z score of birthweight                     | <-1          | 1                       |
|                                            | -1 to 0      | 1.06 [0.87, 1.29]       |
|                                            | 0 to 1       | 0.92 [0.74, 1.13]       |
|                                            | >1           | 0.98 [0.72, 1.33]       |
| Socio-economic level                       | Intermediate | 1                       |
|                                            | High         | 0.68 [0.56, 0.82]       |
| Social security benefits due to low income | No           | 1                       |
|                                            | Yes          | 3.91 [3.32, 4.60]       |
| Urbanicity                                 | Rural        | 1                       |
|                                            | Urban        | 1.81 [1.51, 2.18]       |

HR: hazards ratio; CI: confidence interval.

\*Children with a non-optimal neuromotor and/or psychomotor assessment and/or sensorial disability at two years were considered as non-optimal.

**Supplementary Table 6.** Crude and adjusted association between the neurodevelopment of preterm infants and the risk of parental separation. Adjustment was made on perinatal characteristics of the infants, the socio-economic level of the family, and the urbanicity of the residential municipality. Only one infant from each twins' pair was kept in the analyses (n=3,654).

|                                                  | Category     | N (%)        | Adjusted HR<br>[95% CI] |
|--------------------------------------------------|--------------|--------------|-------------------------|
| Optimality at 2 years*                           | Yes          | 2,919 (79.9) | 1                       |
|                                                  | No           | 735 (20.1)   | 1.39 [1.10, 1.74]       |
| Gender                                           | Female       | 1,676 (45.9) | 1                       |
|                                                  | Male         | 1,978 (54.1) | 1.09 [0.89, 1.33]       |
| Multiple pregnancy                               | No           | 2,763 (75.6) | 1                       |
|                                                  | Yes          | 891 (24.4)   | 0.90 [0.71, 1.15]       |
| Z score of birthweight                           | <-1          | 869 (23.8)   | 1                       |
|                                                  | -1 to 0      | 1,283 (35.1) | 1.08 [0.84, 1.39]       |
|                                                  | 0 to 1       | 1,147 (31.4) | 0.84 [0.64, 1.10]       |
|                                                  | >1           | 355 (9.7)    | 0.95 [0.64, 1.40]       |
| Socio-economic level                             | Intermediate | 2,705 (74)   | 1                       |
|                                                  | High         | 949 (26)     | 0.72 [0.56, 0.92]       |
| Social security benefits (SSB) due to low income | No           | 3,153 (86.3) | 1                       |
|                                                  | Yes          | 501 (13.7)   | 3.48 [2.82, 4.29]       |
| Urbanicity                                       | Rural        | 1,297 (35.5) | 1                       |
|                                                  | Urban        | 2,357 (64.5) | 1.81 [1.43, 2.31]       |

HR: hazards ratio; CI: confidence interval

\* Infants with a non-optimal neuromotor and/or psychomotor assessment and/or sensorial disability at two years were considered as non-optimal.

**Supplementary Table 7.** Comparison of the infants born <35 weeks between 2005 and 2011 still followed at the 60-month visit (n=3,295) and those lost to follow-up between the 24-month and the 60-month visit (n=1,518).

| Variable                                         | Category        | Children still followed at the 60-month visit (n=3295) | Children lost to follow-up between the 24-month and the 60-month visit (n=1518) | P value |
|--------------------------------------------------|-----------------|--------------------------------------------------------|---------------------------------------------------------------------------------|---------|
| Parental separation                              | Living together | 2,868 (87.0)                                           | 1,309 (86.2)                                                                    | 0.469   |
|                                                  | Separated       | 427 (13.0)                                             | 209 (13.8)                                                                      |         |
| Gestational age (weeks)                          | 32–34           | 2,025 (61.5)                                           | 949 (62.5)                                                                      | 0.772   |
|                                                  | 28–31           | 978 (29.7)                                             | 440 (29.0)                                                                      |         |
|                                                  | 24–27           | 292 (8.9)                                              | 129 (8.5)                                                                       |         |
| Optimality at 2 years*                           | Yes             | 2,719 (82.5)                                           | 1,190 (78.4)                                                                    | < 0.001 |
|                                                  | No              | 576 (17.5)                                             | 328 (21.6)                                                                      |         |
| Gender                                           | Female          | 1,507 (45.7)                                           | 693 (45.7)                                                                      | 0.982   |
|                                                  | Male            | 1,788 (54.3)                                           | 825 (54.3)                                                                      |         |
| Multiple pregnancy                               | No              | 2,063 (62.6)                                           | 949 (62.5)                                                                      | 0.976   |
|                                                  | Yes             | 1,232 (37.4)                                           | 569 (37.5)                                                                      |         |
| Z score of birthweight                           | <-1             | 816 (24.8)                                             | 357 (23.6)                                                                      | 0.192   |
|                                                  | -1 to 0         | 1,156 (35.1)                                           | 579 (38.2)                                                                      |         |
|                                                  | 0 to 1          | 1,030 (31.3)                                           | 444 (29.3)                                                                      |         |
|                                                  | >1              | 291 (8.8)                                              | 135 (8.9)                                                                       |         |
| Socio-economic level                             | Intermediate    | 2,318 (70.3)                                           | 1,191 (78.5)                                                                    | < 0.001 |
|                                                  | High            | 977 (29.7)                                             | 327 (21.5)                                                                      |         |
| Social security benefits due to low income (SSB) | No              | 2,864 (86.9)                                           | 1,292 (85.1)                                                                    | 0.099   |
|                                                  | Yes             | 431 (13.1)                                             | 226 (14.9)                                                                      |         |
| Urbanicity                                       | Rural           | 1,221 (37.1)                                           | 550 (36.2)                                                                      | 0.604   |
|                                                  | Urban           | 2,074 (62.9)                                           | 968 (63.8)                                                                      |         |

\*Children with a non-optimal neuromotor and/or psychomotor assessment and/or sensorial disability at two years were considered as non-optimal.

## STROBE Statement—checklist of items that should be included in reports of observational studies

|                           | Item No | Recommendation                                                                                                                                                                                                                                                                                                                                                                                                                                                         | Page                 |
|---------------------------|---------|------------------------------------------------------------------------------------------------------------------------------------------------------------------------------------------------------------------------------------------------------------------------------------------------------------------------------------------------------------------------------------------------------------------------------------------------------------------------|----------------------|
| <b>Title and abstract</b> | 1       | (a) Indicate the study's design with a commonly used term in the title or the abstract                                                                                                                                                                                                                                                                                                                                                                                 | 1                    |
|                           |         | (b) Provide in the abstract an informative and balanced summary of what was done and what was found                                                                                                                                                                                                                                                                                                                                                                    | 2                    |
| <b>Introduction</b>       |         |                                                                                                                                                                                                                                                                                                                                                                                                                                                                        |                      |
| Background/rationale      | 2       | Explain the scientific background and rationale for the investigation being reported                                                                                                                                                                                                                                                                                                                                                                                   | 4                    |
| Objectives                | 3       | State specific objectives, including any prespecified hypotheses                                                                                                                                                                                                                                                                                                                                                                                                       | 4                    |
| <b>Methods</b>            |         |                                                                                                                                                                                                                                                                                                                                                                                                                                                                        |                      |
| Study design              | 4       | Present key elements of study design early in the paper                                                                                                                                                                                                                                                                                                                                                                                                                | 5,7,8                |
| Setting                   | 5       | Describe the setting, locations, and relevant dates, including periods of recruitment, exposure, follow-up, and data collection                                                                                                                                                                                                                                                                                                                                        | 5-7                  |
| Participants              | 6       | (a) <i>Cohort study</i> —Give the eligibility criteria, and the sources and methods of selection of participants. Describe methods of follow-up<br><i>Case-control study</i> —Give the eligibility criteria, and the sources and methods of case ascertainment and control selection. Give the rationale for the choice of cases and controls<br><i>Cross-sectional study</i> —Give the eligibility criteria, and the sources and methods of selection of participants | 5                    |
|                           |         | (b) <i>Cohort study</i> —For matched studies, give matching criteria and number of exposed and unexposed<br><i>Case-control study</i> —For matched studies, give matching criteria and the number of controls per case                                                                                                                                                                                                                                                 | Not applicable       |
| Variables                 | 7       | Clearly define all outcomes, exposures, predictors, potential confounders, and effect modifiers. Give diagnostic criteria, if applicable                                                                                                                                                                                                                                                                                                                               | 5-8                  |
| Data sources/measurement  | 8*      | For each variable of interest, give sources of data and details of methods of assessment (measurement). Describe comparability of assessment methods if there is more than one group                                                                                                                                                                                                                                                                                   | 5-8                  |
| Bias                      | 9       | Describe any efforts to address potential sources of bias                                                                                                                                                                                                                                                                                                                                                                                                              | 7,8 + sup tab 4, 5 6 |
| Study size                | 10      | Explain how the study size was arrived at                                                                                                                                                                                                                                                                                                                                                                                                                              | Not applicable       |
| Quantitative variables    | 11      | Explain how quantitative variables were handled in the analyses. If applicable, describe which groupings were chosen and why                                                                                                                                                                                                                                                                                                                                           | 8                    |
| Statistical methods       | 12      | (a) Describe all statistical methods, including those used to control for confounding                                                                                                                                                                                                                                                                                                                                                                                  | 7,8                  |
|                           |         | (b) Describe any methods used to examine subgroups and interactions                                                                                                                                                                                                                                                                                                                                                                                                    | Sup tab 3            |
|                           |         | (c) Explain how missing data were addressed                                                                                                                                                                                                                                                                                                                                                                                                                            | Sup tab 5            |
|                           |         | (d) <i>Cohort study</i> —If applicable, explain how loss to follow-up was addressed<br><i>Case-control study</i> —If applicable, explain how matching of cases and controls was addressed<br><i>Cross-sectional study</i> —If applicable, describe analytical methods taking                                                                                                                                                                                           | Sup tab 6            |

|                          |     | account of sampling strategy                                                                                                                                                                                 |            |
|--------------------------|-----|--------------------------------------------------------------------------------------------------------------------------------------------------------------------------------------------------------------|------------|
|                          |     | (e) Describe any sensitivity analyses                                                                                                                                                                        | Sup mat    |
| <b>Results</b>           |     |                                                                                                                                                                                                              | Page       |
| Participants             | 13* | (a) Report numbers of individuals at each stage of study—eg numbers potentially eligible, examined for eligibility, confirmed eligible, included in the study, completing follow-up, and analysed            | Fig1       |
|                          |     | (b) Give reasons for non-participation at each stage                                                                                                                                                         | 9          |
|                          |     | (c) Consider use of a flow diagram                                                                                                                                                                           | Fig1       |
| Descriptive data         | 14* | (a) Give characteristics of study participants (eg demographic, clinical, social) and information on exposures and potential confounders                                                                     | Tab1       |
|                          |     | (b) Indicate number of participants with missing data for each variable of interest                                                                                                                          | Tab1, Fig1 |
|                          |     | (c) <i>Cohort study</i> —Summarise follow-up time (eg, average and total amount)                                                                                                                             | Tab1       |
| Outcome data             | 15* | <i>Cohort study</i> —Report numbers of outcome events or summary measures over time                                                                                                                          | 9          |
|                          |     | <i>Case-control study</i> —Report numbers in each exposure category, or summary measures of exposure                                                                                                         |            |
|                          |     | <i>Cross-sectional study</i> —Report numbers of outcome events or summary measures                                                                                                                           |            |
| Main results             | 16  | (a) Give unadjusted estimates and, if applicable, confounder-adjusted estimates and their precision (eg, 95% confidence interval). Make clear which confounders were adjusted for and why they were included | Tab2       |
|                          |     | (b) Report category boundaries when continuous variables were categorized                                                                                                                                    | Tab1       |
|                          |     | (c) If relevant, consider translating estimates of relative risk into absolute risk for a meaningful time period                                                                                             |            |
| Other analyses           | 17  | Report other analyses done—eg analyses of subgroups and interactions, and sensitivity analyses                                                                                                               | Sup mat    |
| <b>Discussion</b>        |     |                                                                                                                                                                                                              |            |
| Key results              | 18  | Summarise key results with reference to study objectives                                                                                                                                                     | 10         |
| Limitations              | 19  | Discuss limitations of the study, taking into account sources of potential bias or imprecision. Discuss both direction and magnitude of any potential bias                                                   | 11,12      |
| Interpretation           | 20  | Give a cautious overall interpretation of results considering objectives, limitations, multiplicity of analyses, results from similar studies, and other relevant evidence                                   | 11-13      |
| Generalisability         | 21  | Discuss the generalisability (external validity) of the study results                                                                                                                                        | 12         |
| <b>Other information</b> |     |                                                                                                                                                                                                              |            |
| Funding                  | 22  | Give the source of funding and the role of the funders for the present study and, if applicable, for the original study on which the present article is based                                                | 13         |

\*Give information separately for cases and controls in case-control studies and, if applicable, for exposed and unexposed groups in cohort and cross-sectional studies.

**Note:** An Explanation and Elaboration article discusses each checklist item and gives methodological background and published examples of transparent reporting. The STROBE checklist is best used in conjunction with this article (freely available on the Web sites of PLoS Medicine at <http://www.plosmedicine.org/>, Annals of Internal Medicine at <http://www.annals.org/>, and Epidemiology at <http://www.epidem.com/>). Information on the STROBE Initiative is available at [www.strobe-statement.org](http://www.strobe-statement.org).
